# Supplementary material for: Spatial Distribution of the Metabolically Active Microbiota within Italian PDO Ewes' Milk Cheeses
Source: PubMed Central journal article supplement (PMC4830609; doi:10.1371/journal.pone.0153213), 2016-04-13
Supplement: pone.0153213.s004.pdf [file pone.0153213.s004.pdf]

**S1 Table. Main chemical composition\* of Fiore Sardo, Pecorino Siciliano and Pecorino Toscano cheeses.**

|                                            | <b>Control<sup>§</sup></b> | <b>A</b>                | <b>D</b>                | <b>G</b>               | <b>B</b>              | <b>E</b>              | <b>H</b>                           | <b>C</b>              | <b>F</b>                | <b>I</b>                |
|--------------------------------------------|----------------------------|-------------------------|-------------------------|------------------------|-----------------------|-----------------------|------------------------------------|-----------------------|-------------------------|-------------------------|
| <b>Fiore Sardo</b>                         |                            |                         |                         |                        |                       |                       |                                    |                       |                         |                         |
| Mean pH<br>± SD                            | 5.78±0.4 <sup>d</sup>      | 5.83±0.3 <sup>b</sup>   | 5.85±0.4 <sup>a</sup>   | 5.80±0.2 <sup>c</sup>  | 5.81±0.2 <sup>c</sup> | 5.80±0.1 <sup>c</sup> | 5.81±0.3 <sup>b</sup>              | 5.80±0.1 <sup>c</sup> | 5.83±0.2 <sup>b</sup>   | 5.82±0.1 <sup>c</sup>   |
| Mean<br>moisture<br>content<br>(%)<br>± SD | 19.2±1.4 <sup>b-c</sup>    | 12.1±1.2 <sup>g</sup>   | 18.2±1.2 <sup>c</sup>   | 12.0 ±1.1 <sup>f</sup> | 12.5±1.3 <sup>f</sup> | 25.2±1.3 <sup>a</sup> | 12.0±1.3 <sup>f</sup>              | 13.0±1.2 <sup>e</sup> | 19.2±1.1 <sup>b</sup>   | 13.4 ± 1.4 <sup>d</sup> |
| Mean fat<br>content<br>(%)<br>± SD         | 27.5±1.6 <sup>b</sup>      | 28.2±1.3 <sup>a</sup>   | 26.5 ±1.1 <sup>c</sup>  | 27.8 ±1.4 <sup>b</sup> | 28.1±1.2 <sup>a</sup> | 25.1±1.0 <sup>d</sup> | 28.5±1.2 <sup>a</sup>              | 27.9±1.4 <sup>b</sup> | 27. ±1.2 <sup>b-c</sup> | 28.3±1.3 <sup>a</sup>   |
| Mean<br>protein<br>content<br>(%) ± SD     | 26.1±1.4 <sup>c</sup>      | 26.9±1.1 <sup>b</sup>   | 25.1±1.1 <sup>d</sup>   | 27.0±1.2 <sup>a</sup>  | 27.2±1.0 <sup>a</sup> | 24.4±1.3 <sup>e</sup> | 26.7±1.3 <sup>b</sup>              | 26.8±1.2 <sup>b</sup> | 25.0±1.2 <sup>d</sup>   | 27.1±1.2 <sup>a</sup>   |
| Mean<br>NaCl<br>content<br>(%) ± SD        | 4.2±0.04 <sup>d</sup>      | 4.5±0.01 <sup>b</sup>   | 4.0±0.04 <sup>d</sup>   | 4.6±0.01 <sup>a</sup>  | 4.4±0.02 <sup>c</sup> | 4.1±0.05 <sup>e</sup> | 4.5±0.02 <sup>b</sup>              | 4.6±0.03 <sup>a</sup> | 3.9±0.04 <sup>f</sup>   | 4.4±0.02 <sup>c</sup>   |
| <b>Pecorino Siciliano</b>                  |                            |                         |                         |                        |                       |                       |                                    |                       |                         |                         |
| Mean pH<br>± SD                            | 5.73±0. 4 <sup>c-d</sup>   | 5.72±0.1 <sup>d</sup>   | 5.74±0.2 <sup>c-d</sup> | 5.70±0.2 <sup>d</sup>  | 5.71±0.2 <sup>d</sup> | 5.9±0.3 <sup>a</sup>  | 5.73±0.2 <sup>c-D</sup>            | 5.81±0.4 <sup>b</sup> | 5.75±0.2 <sup>c</sup>   | 5.79±0.3 <sup>c</sup>   |
| Mean<br>moisture<br>content<br>(%) ± SD    | 18.8±1.3 <sup>d</sup>      | 15.2±1.0 <sup>e</sup>   | 22.0±1.2 <sup>c</sup>   | 15.5±1.4 <sup>e</sup>  | 14.6±1.2 <sup>f</sup> | 25.0±1.1 <sup>a</sup> | 15.3±1.2 <sup>d</sup> <sup>e</sup> | 14.7±1.3 <sup>f</sup> | 23.0±0.9 <sup>b</sup>   | 14.9±1.1 <sup>f</sup>   |
| Mean fat<br>content<br>(%) ± SD            | 18.4±1.4 <sup>c</sup>      | 19. ±0.9 <sup>a-B</sup> | 18.7±1.2 <sup>c</sup>   | 19.0±0.9 <sup>b</sup>  | 19.7±1.1 <sup>a</sup> | 17.3±1.1 <sup>d</sup> | 19.1±0.7 <sup>b</sup>              | 19.9±1.2 <sup>a</sup> | 17.1±1.4 <sup>d</sup>   | 19.4±1.4 <sup>a-b</sup> |

|                                    |                               |                               |                              |                             |                             |                             |                             |                               |                             |                             |
|------------------------------------|-------------------------------|-------------------------------|------------------------------|-----------------------------|-----------------------------|-----------------------------|-----------------------------|-------------------------------|-----------------------------|-----------------------------|
| Mean protein content (%) $\pm$ SD  | 30.6 $\pm$ 1.9 <sup>cd</sup>  | 31.5 $\pm$ 1.8 <sup>b</sup>   | 28.9 $\pm$ 1.0 <sup>ef</sup> | 31.4 $\pm$ 1.1 <sup>b</sup> | 30.4 $\pm$ 1.2 <sup>d</sup> | 28.1 $\pm$ 1.7 <sup>f</sup> | 31.1 $\pm$ 1.2 <sup>c</sup> | 30.2 $\pm$ 1.1 <sup>d</sup>   | 29.6 $\pm$ 1.2 <sup>e</sup> | 31.9 $\pm$ 1.3 <sup>a</sup> |
| Mean NaCl content (%) $\pm$ SD     | 3.8 $\pm$ 0.02 <sup>e</sup>   | 4.3 $\pm$ 0.01 <sup>c</sup>   | 3.6 $\pm$ 0.04 <sup>f</sup>  | 3.9 $\pm$ 0.01 <sup>d</sup> | 3.9 $\pm$ 0.03 <sup>d</sup> | 3.5 $\pm$ 0.05 <sup>f</sup> | 4.5 $\pm$ 0.03 <sup>a</sup> | 4.3 $\pm$ 0.02 <sup>c</sup>   | 3.3 $\pm$ 0.02 <sup>g</sup> | 4.4 $\pm$ 0.01 <sup>b</sup> |
|                                    | <b>Pecorino Toscano</b>       |                               |                              |                             |                             |                             |                             |                               |                             |                             |
| Mean pH $\pm$ SD                   | 5.81 $\pm$ 0.3 <sup>b</sup>   | 6.01 $\pm$ 0.2 <sup>a</sup>   | 6.03 $\pm$ 0.1 <sup>a</sup>  | 6.04 $\pm$ 0.2 <sup>a</sup> | 5.6 $\pm$ 0.1 <sup>d</sup>  | 5.51 $\pm$ 0.3 <sup>e</sup> | 5.7 $\pm$ 0.2 <sup>c</sup>  | 5.8 $\pm$ 0.2 <sup>b</sup>    | 5.71 $\pm$ 0.2 <sup>c</sup> | 5.6 $\pm$ 0.2 <sup>d</sup>  |
| Mean moisture content (%) $\pm$ SD | 18.5 $\pm$ 1.4 <sup>b-c</sup> | 13.1 $\pm$ 1.2 <sup>d-e</sup> | 18.0 $\pm$ 1.3 <sup>b</sup>  | 12.1 $\pm$ 1.1 <sup>e</sup> | 12.5 $\pm$ 1.1 <sup>e</sup> | 20 $\pm$ 1.2 <sup>a</sup>   | 13.7 $\pm$ 1.3 <sup>d</sup> | 13.4 $\pm$ 1.2 <sup>d-E</sup> | 17.0 $\pm$ 1.0 <sup>c</sup> | 13.4 $\pm$ 1.2 <sup>d</sup> |
| Mean fat content (%) $\pm$ SD      | 19.2 $\pm$ 1.8 <sup>c</sup>   | 20.1 $\pm$ 1.4 <sup>b</sup>   | 18.4 $\pm$ 1.3 <sup>d</sup>  | 20.4 $\pm$ 1.4 <sup>b</sup> | 20.4 $\pm$ 1.4 <sup>b</sup> | 17.9 $\pm$ 1.4 <sup>e</sup> | 21.0 $\pm$ 1.5 <sup>a</sup> | 20.0 $\pm$ 1.2 <sup>b</sup>   | 18.6 $\pm$ 1.5 <sup>d</sup> | 20.4 $\pm$ 1.0 <sup>b</sup> |
| Mean protein content (%) $\pm$ SD  | 28.4 $\pm$ 1.7 <sup>d</sup>   | 29.1 $\pm$ 1.0 <sup>c</sup>   | 28.9 $\pm$ 1.1 <sup>c</sup>  | 29.4 $\pm$ 1.2 <sup>b</sup> | 29.7 $\pm$ 0.9 <sup>a</sup> | 28.4 $\pm$ 1.0 <sup>d</sup> | 29.3 $\pm$ 0.9 <sup>b</sup> | 29.0 $\pm$ 1.2 <sup>c</sup>   | 28.7 $\pm$ 1.3 <sup>d</sup> | 29.6 $\pm$ 0.8 <sup>a</sup> |
| Mean NaCl content (%) $\pm$ SD     | 3.2 $\pm$ 0.07 <sup>h</sup>   | 4.0 $\pm$ 0.02 <sup>d</sup>   | 3.8 $\pm$ 0.02 <sup>e</sup>  | 4.3 $\pm$ 0.02 <sup>d</sup> | 4.1 $\pm$ 0.03 <sup>c</sup> | 3.4 $\pm$ 0.03 <sup>g</sup> | 4.4 $\pm$ 0.02 <sup>a</sup> | 4.2 $\pm$ 0.01 <sup>b</sup>   | 3.7 $\pm$ 0.04 <sup>f</sup> | 4.1 $\pm$ 0.01 <sup>c</sup> |

Data in the same column with different superscript letters (a-h) are significantly different (P<0.05).

\*Mean values  $\pm$  standard deviations for three batches of each type of cheese, analysed in duplicate.

<sup>§</sup>Slice of each cheese was cut into nine sub-blocks identified by the letters A - I. Sub-blocks A, D, and G, and sub-blocks C, F and I were collected from top and bottom surface region, respectively, whereas sub-blocks B and H from inner side region, and sub-block E from the core. The whole slice was the control. Further details were reported in the Material and Methods and in Fig. 1.
