# Supplementary material for: Spatial Distribution of the Metabolically Active Microbiota within Italian PDO Ewes' Milk Cheeses
Source: PubMed Central journal article supplement (PMC4830609; doi:10.1371/journal.pone.0153213), 2016-04-13
Supplement: pone.0153213.s005.pdf [file pone.0153213.s005.pdf]

**S2 Table. Free amino acids (FAA) found in Fiore Sardo, Pecorino Siciliano, and Pecorino Toscano cheeses.** Mean values\* for the level of FAA (mg/kg) found in Fiore Sardo, Pecorino Siciliano, and Pecorino Toscano.

| FAA                       | Mean concentration of FAA (mg/kg) |                                |                               |                    |                                |                                |                                |                                |                                |                               |
|---------------------------|-----------------------------------|--------------------------------|-------------------------------|--------------------|--------------------------------|--------------------------------|--------------------------------|--------------------------------|--------------------------------|-------------------------------|
|                           | Control*                          | A                              | D                             | G                  | B                              | E                              | H                              | C                              | F                              | I                             |
| <b>Fiore Sardo</b>        |                                   |                                |                               |                    |                                |                                |                                |                                |                                |                               |
| Asp                       | 458.4                             | 423.5                          | 313.7                         | 410.5              | 399.2                          | 337.5                          | 484.4                          | 481.4                          | 410.5                          | 364.8                         |
| Thr                       | 225.4                             | 285.7                          | 151.0                         | 196.5              | 189.8                          | 151.7                          | 231.9                          | 340.0                          | 196.5                          | 181.6                         |
| Ser                       | 1182.7                            | 814.3                          | 514.4                         | 842.2              | 1009.7                         | 1027.1                         | 875.8                          | 560.8                          | 842.2                          | 856.6                         |
| Glu                       | 1362.4                            | 1304.2                         | 1151.7                        | 1331.8             | 1246.7                         | 1175.9                         | 1343.0                         | 1382.9                         | 1331.8                         | 1242.6                        |
| Gly                       | 177.5                             | 157.1                          | 127.8                         | 157.0              | 152.2                          | 130.9                          | 180.6                          | 441.1                          | 157.0                          | 150.2                         |
| Ala                       | 531.9                             | 441.8                          | 492.7                         | 502.5              | 472.5                          | 466.3                          | 528.7                          | 388.6                          | 502.5                          | 476.7                         |
| Cys                       | 59.8                              | 106.0                          | 60.4                          | 0.0                | 0.0                            | 58.2                           | 1109.1                         | 835.5                          | 0.0                            | 64.0                          |
| Val                       | 1003.4                            | 831.9                          | 814.3                         | 994.3              | 949.0                          | 946.6                          | 673.8                          | 1011.4                         | 994.3                          | 950.9                         |
| Met                       | 479.2                             | 512.4                          | 467.8                         | 463.5              | 416.7                          | 414.1                          | 595.1                          | 534.7                          | 463.5                          | 395.1                         |
| Ile                       | 581.8                             | 612.4                          | 482.8                         | 572.3              | 507.9                          | 464.2                          | 953.4                          | 646.0                          | 572.3                          | 479.0                         |
| Leu                       | 1329.9                            | 1155.3                         | 912.7                         | 1347.1             | 1267.2                         | 1270.3                         | 960.9                          | 1386.2                         | 1347.1                         | 1236.4                        |
| Tyr                       | 551.7                             | 455.6                          | 533.2                         | 703.2              | 616.4                          | 514.2                          | 1066.8                         | 743.7                          | 703.2                          | 380.5                         |
| Phe                       | 1377.2                            | 1116.0                         | 1391.8                        | 1368.5             | 1222.6                         | 1278.8                         | 1157.0                         | 1465.4                         | 1368.5                         | 1258.5                        |
| His                       | 668.7                             | 535.0                          | 53.3                          | 677.0              | 615.6                          | 636.5                          | 281.8                          | 689.6                          | 677.0                          | 643.3                         |
| Trp                       | 107.2                             | 74.5                           | 204.7                         | 175.1              | 74.0                           | 207.7                          | 95.3                           | 255.3                          | 175.1                          | 151.0                         |
| Orn                       | 474.5                             | 135.5                          | 401.7                         | 457.5              | 173.5                          | 472.7                          | 125.4                          | 404.0                          | 457.5                          | 272.6                         |
| Lys                       | 835.2                             | 738.4                          | 1020.6                        | 807.2              | 758.5                          | 801.3                          | 784.4                          | 850.0                          | 807.2                          | 814.0                         |
| Arg                       | 1101.9                            | 1203.2                         | 71.1                          | 1068.8             | 1010.8                         | 997.3                          | 1098.3                         | 1137.0                         | 1068.8                         | 1033.1                        |
| Pro                       | 82.0                              | 60.5                           | 812.3                         | 79.8               | 75.0                           | 68.7                           | 92.1                           | 97.2                           | 79.8                           | 41.2                          |
| <b>Total</b>              | 12590.8 ±<br>72.5 <sup>a</sup>    | 10936.5 ±<br>44.5 <sup>b</sup> | 9977.9 ±<br>32.4 <sup>c</sup> | 12637.7 ±<br>31.5a | 11157.3 ±<br>58.4 <sup>b</sup> | 11420.1 ±<br>42.1 <sup>b</sup> | 12201.7 ±<br>79.1 <sup>a</sup> | 12540.5 ±<br>75.5 <sup>a</sup> | 12155.0 ±<br>48.5 <sup>a</sup> | 10992 ±<br>38.50 <sup>b</sup> |
| <b>Pecorino Siciliano</b> |                                   |                                |                               |                    |                                |                                |                                |                                |                                |                               |
| Asp                       | 973.4                             | 655.2                          | 1283.2                        | 568.9              | 729.4                          | 1461.5                         | 76.3                           | 432.3                          | 1084.4                         | 497.4                         |
| Thr                       | 452.6                             | 314.0                          | 595.3                         | 267.8              | 406.5                          | 625.5                          | 504.8                          | 232.7                          | 486.3                          | 236.5                         |
| Ser                       | 1055.3                            | 772.4                          | 1386.4                        | 723.7              | 774.6                          | 1210.5                         | 301.9                          | 405.7                          | 1133.3                         | 644.3                         |
| Glu                       | 1585.5                            | 1104.7                         | 891.4                         | 1220.1             | 1506.8                         | 1810.5                         | 435.2                          | 1224.7                         | 759.8                          | 1192.4                        |

|                         |                                |                               |                                |                               |                                |                                |                               |                                |                                |                               |
|-------------------------|--------------------------------|-------------------------------|--------------------------------|-------------------------------|--------------------------------|--------------------------------|-------------------------------|--------------------------------|--------------------------------|-------------------------------|
| Gly                     | 242.0                          | 181.1                         | 316.4                          | 155.6                         | 210.5                          | 316.9                          | 157.6                         | 141.1                          | 258.3                          | 128.7                         |
| Ala                     | 627.5                          | 497.9                         | 718.2                          | 421.5                         | 592.8                          | 696.8                          | 398.4                         | 422.3                          | 595.7                          | 357.3                         |
| Cys                     | 85.6                           | 52.1                          | 111.2                          | 44.5                          | 71.4                           | 126.5                          | 60.2                          | 51.5                           | 93.5                           | 42.2                          |
| Val                     | 774.3                          | 511.4                         | 856.1                          | 539.8                         | 720.5                          | 846.5                          | 599.9                         | 538.3                          | 740.0                          | 486.9                         |
| Met                     | 641.6                          | 301.4                         | 761.9                          | 405.2                         | 581.4                          | 737.5                          | 397.2                         | 383.5                          | 605.6                          | 344.8                         |
| Ile                     | 865.8                          | 638.3                         | 1033.4                         | 541.5                         | 751.8                          | 996.1                          | 512.6                         | 489.9                          | 864.2                          | 486.9                         |
| Leu                     | 1009.8                         | 601.4                         | 1146.6                         | 681.5                         | 921.3                          | 1144.5                         | 877.7                         | 652.6                          | 989.9                          | 610.9                         |
| Tyr                     | 388.9                          | 321.9                         | 458.1                          | 227.3                         | 325.5                          | 489.1                          | 326.7                         | 260.1                          | 314.0                          | 184.5                         |
| Phe                     | 741.9                          | 307.8                         | 889.4                          | 411.4                         | 667.3                          | 998.2                          | 666.2                         | 380.3                          | 742.5                          | 369.6                         |
| His                     | 43.4                           | 32.5                          | 8.9                            | 25.3                          | 63.3                           | 10.9                           | 112.7                         | 39.7                           | 9.4                            | 11.8                          |
| Trp                     | 125.2                          | 106.9                         | 137.1                          | 110.0                         | 95.7                           | 34.9                           | 92.7                          | 84.5                           | 69.6                           | 88.2                          |
| Orn                     | 164.7                          | 140.8                         | 180.4                          | 144.8                         | 364.4                          | 45.9                           | 156.4                         | 265.1                          | 91.6                           | 116.0                         |
| Lys                     | 487.0                          | 114.4                         | 631.0                          | 259.6                         | 355.3                          | 755.2                          | 331.3                         | 198.2                          | 539.9                          | 227.3                         |
| Arg                     | 1280.6                         | 1028.1                        | 1403.5                         | 977.6                         | 1211.1                         | 1356.2                         | 853.2                         | 928.0                          | 1234.0                         | 902.2                         |
| Pro                     | 243.1                          | 246.4                         | 224.8                          | 235.6                         | 285.5                          | 52.0                           | 117.3                         | 243.0                          | 138.6                          | 180.6                         |
| <b>Total</b>            | 11788.2 ±<br>64.9 <sup>b</sup> | 7928.7 ±<br>61.8 <sup>c</sup> | 13033.2 ±<br>11.4 <sup>a</sup> | 7961.7 ±<br>39.4 <sup>c</sup> | 10634.9 ±<br>59.5 <sup>b</sup> | 13715.0 ±<br>75.6 <sup>a</sup> | 6978.4 ±<br>43.4 <sup>c</sup> | 7373.9 ±<br>40.73 <sup>d</sup> | 10750.7 ±<br>62.9 <sup>b</sup> | 7108.5 ±<br>41.1 <sup>c</sup> |
| <b>Pecorino Toscano</b> |                                |                               |                                |                               |                                |                                |                               |                                |                                |                               |
| Asp                     | 335.1                          | 148.5                         | 117.2                          | 126.3                         | 297.2                          | 89.0                           | 223.7                         | 253.6                          | 340.3                          | 307.0                         |
| Thr                     | 181.0                          | 104.3                         | 60.5                           | 88.8                          | 146.8                          | 51.5                           | 116.5                         | 276.4                          | 237.6                          | 234.0                         |
| Ser                     | 573.6                          | 326.0                         | 187.7                          | 216.3                         | 441.3                          | 333.5                          | 444.5                         | 596.8                          | 695.6                          | 777.8                         |
| Glu                     | 1017.3                         | 881.6                         | 555.3                          | 501.7                         | 501.4                          | 523.1                          | 874.9                         | 2061.4                         | 880.7                          | 945.1                         |
| Gly                     | 104.4                          | 64.7                          | 47.6                           | 62.7                          | 135.8                          | 46.4                           | 77.6                          | 153.7                          | 119.2                          | 152.4                         |
| Ala                     | 290.8                          | 130.9                         | 155.5                          | 175.3                         | 367.7                          | 113.2                          | 200.7                         | 308.5                          | 346.8                          | 407.3                         |
| Cys                     | 57.0                           | 242.7                         | 299.4                          | 341.2                         | 435.8                          | 299.2                          | 305.8                         | 445.5                          | 439.4                          | 481.9                         |
| Val                     | 490.5                          | 301.8                         | 46.4                           | 64.8                          | 296.8                          | 44.4                           | 127.0                         | 87.4                           | 101.3                          | 131.7                         |
| Met                     | 262.6                          | 179.6                         | 141.1                          | 165.6                         | 402.4                          | 97.7                           | 180.2                         | 365.3                          | 281.7                          | 397.4                         |
| Ile                     | 357.7                          | 216.0                         | 158.0                          | 208.1                         | 412.8                          | 102.0                          | 235.4                         | 376.1                          | 346.5                          | 422.0                         |
| Leu                     | 689.2                          | 601.4                         | 523.1                          | 501.4                         | 509.7                          | 549.3                          | 616.1                         | 821.8                          | 743.4                          | 927.3                         |
| Tyr                     | 261.0                          | 370.3                         | 231.2                          | 297.1                         | 770.8                          | 194.5                          | 228.4                         | 529.7                          | 383.2                          | 627.8                         |
| Phe                     | 476.5                          | 201.1                         | 102.1                          | 477.6                         | 907.8                          | 403.1                          | 453.3                         | 660.3                          | 594.1                          | 720.3                         |
| His                     | 89.7                           | 101.1                         | 117.5                          | 132.2                         | 432.7                          | 173.2                          | 123.7                         | 265.0                          | 199.4                          | 293.7                         |
| Trp                     | 180.9                          | 72.7                          | 58.0                           | 72.9                          | 120.5                          | 39.9                           | 59.1                          | 159.4                          | 119.6                          | 126.2                         |

|              |                               |                               |                               |                               |                               |                               |                               |                               |                               |                               |
|--------------|-------------------------------|-------------------------------|-------------------------------|-------------------------------|-------------------------------|-------------------------------|-------------------------------|-------------------------------|-------------------------------|-------------------------------|
| Orn          | 181.3                         | 182.1                         | 258.1                         | 349.3                         | 578.0                         | 186.2                         | 207.2                         | 700.6                         | 472.5                         | 744.0                         |
| Lys          | 183.5                         | 124.4                         | 89.8                          | 130.7                         | 195.5                         | 116.9                         | 160.5                         | 126.8                         | 143.1                         | 200.2                         |
| Arg          | 688.2                         | 516.2                         | 314.1                         | 414.7                         | 680.0                         | 233.0                         | 503.7                         | 586.3                         | 598.2                         | 576.4                         |
| Pro          | 86.9                          | 20.3                          | 24.0                          | 19.7                          | 82.0                          | 20.6                          | 40.5                          | 55.7                          | 32.4                          | 37.8                          |
| <b>Total</b> | 6507.3 ±<br>32.1 <sup>c</sup> | 4785.8 ±<br>31.9 <sup>c</sup> | 3486.5 ±<br>23.4 <sup>d</sup> | 4346.3 ±<br>41.6 <sup>c</sup> | 7714.5 ±<br>33.1 <sup>b</sup> | 3616.6 ±<br>50.9 <sup>d</sup> | 5178.9 ±<br>26.1 <sup>c</sup> | 8830.1 ±<br>63.7 <sup>a</sup> | 7075.0 ±<br>63.3 <sup>b</sup> | 8510.2 ±<br>72.8 <sup>a</sup> |

Data in the same row with different superscript letters (a-d) are significantly different (P<0.05).

\*Mean values ± standard deviations for three batches of each type of cheese, analysed in triplicate.

§Slice of each cheese was cut into nine sub-blocks identified by the letters A - I. Sub-blocks A, D, and G, and sub-blocks C, F and I were collected from top and bottom surface region, respectively, whereas sub-blocks B and H from inner side region, and sub-block E from the core. The whole slice was the control. Further details were reported in the Material and Methods and in Fig. 1.
