# Supplementary material for: Spatial Distribution of the Metabolically Active Microbiota within Italian PDO Ewes' Milk Cheeses
Source: PubMed Central journal article supplement (PMC4830609; doi:10.1371/journal.pone.0153213), 2016-04-13
Supplement: pone.0153213.s006.pdf [file pone.0153213.s006.pdf]

**S3 Table. Volatile components (VOC) identified in Fiore Sardo, Pecorino Siciliano, and Pecorino Toscano cheeses.** Concentrations of VOC (log of units of area) identified in Fiore Sardo, Pecorino Siciliano and Pecorino Toscano.

| Component                  | Concentration*       |                  |                  |                  |                  |                  |                  |                  |                  |                  |
|----------------------------|----------------------|------------------|------------------|------------------|------------------|------------------|------------------|------------------|------------------|------------------|
|                            | Control <sup>s</sup> | A                | D                | G                | B                | E                | H                | C                | F                | I                |
| <b>Fiore Sardo</b>         |                      |                  |                  |                  |                  |                  |                  |                  |                  |                  |
| VOC (log of units of area) |                      |                  |                  |                  |                  |                  |                  |                  |                  |                  |
| <i>Aldehydes</i>           |                      |                  |                  |                  |                  |                  |                  |                  |                  |                  |
| Acetaldehyde               | 6.1 <sup>c</sup>     | 6.3 <sup>a</sup> | 6.1 <sup>c</sup> | 6.2 <sup>b</sup> | 6.3 <sup>a</sup> | 6.1 <sup>c</sup> | 6.1 <sup>c</sup> | 6.1 <sup>c</sup> | 6.2 <sup>b</sup> | 6.2 <sup>b</sup> |
| Butanal                    | 6.0 <sup>a</sup>     | 5.8 <sup>c</sup> | 5.7 <sup>d</sup> | 5.8 <sup>c</sup> | 5.9 <sup>b</sup> | 5.8 <sup>c</sup> | 6.0 <sup>a</sup> | 5.7 <sup>d</sup> | 5.8 <sup>c</sup> | 5.8 <sup>c</sup> |
| Pentanal                   | 7.1 <sup>b</sup>     | 6.9 <sup>c</sup> | 6.5 <sup>h</sup> | 6.5 <sup>h</sup> | 6.8 <sup>e</sup> | 6.7 <sup>f</sup> | 7.2 <sup>a</sup> | 6.6 <sup>g</sup> | 6.7 <sup>f</sup> | 6.8 <sup>e</sup> |
| Hexanal                    | 6.4 <sup>c</sup>     | 6.5 <sup>b</sup> | 6.4 <sup>c</sup> | 6.3 <sup>d</sup> | 6.5 <sup>b</sup> | 6.5 <sup>b</sup> | 6.6 <sup>a</sup> | 6.3 <sup>d</sup> | 6.5 <sup>b</sup> | 6.4 <sup>c</sup> |
| Heptanal                   | 5.8 <sup>b</sup>     | 5.8 <sup>b</sup> | 5.6 <sup>e</sup> | 5.5 <sup>f</sup> | 5.7 <sup>c</sup> | 5.7 <sup>c</sup> | 5.9 <sup>a</sup> | 5.6 <sup>d</sup> | 5.8 <sup>b</sup> | 5.6 <sup>d</sup> |
| Octanal                    | 5.8 <sup>a</sup>     | 5.6 <sup>c</sup> | 5.4 <sup>e</sup> | 5.3 <sup>f</sup> | 5.5 <sup>d</sup> | 5.5 <sup>d</sup> | 5.6 <sup>c</sup> | 5.5 <sup>d</sup> | 5.7 <sup>b</sup> | 5.4 <sup>e</sup> |
| Nonanal                    | 6.0 <sup>c</sup>     | 6.2 <sup>a</sup> | 5.9 <sup>d</sup> | 5.8 <sup>e</sup> | 6.1 <sup>b</sup> | 5.9 <sup>d</sup> | 5.9 <sup>d</sup> | 6.0 <sup>c</sup> | 6.1 <sup>b</sup> | 5.9 <sup>d</sup> |
| Decanal                    | 4.4 <sup>d</sup>     | 4.8 <sup>a</sup> | 4.4 <sup>d</sup> | 4.4 <sup>d</sup> | 4.5 <sup>c</sup> | 4.2 <sup>e</sup> | 4.4 <sup>d</sup> | 4.4 <sup>d</sup> | 4.6 <sup>b</sup> | 4.5 <sup>c</sup> |
| Propenal                   | 5.5 <sup>d</sup>     | 5.9 <sup>a</sup> | 5.1 <sup>g</sup> | 5.3 <sup>f</sup> | 5.3 <sup>f</sup> | 5.4 <sup>e</sup> | 5.6 <sup>c</sup> | 5.7 <sup>b</sup> | 5.5 <sup>d</sup> | 5.7 <sup>b</sup> |
| 2-Pentenal                 | 5.4 <sup>b</sup>     | 5.4 <sup>b</sup> | 5.2 <sup>d</sup> | 5.2 <sup>d</sup> | 5.3 <sup>c</sup> | 5.2 <sup>d</sup> | 5.5 <sup>a</sup> | 5.2 <sup>d</sup> | 5.4 <sup>b</sup> | 5.2 <sup>d</sup> |
| 2-Hexenal                  | 5.1 <sup>c</sup>     | 5.1 <sup>c</sup> | 5.0 <sup>d</sup> | 5.0 <sup>d</sup> | 5.1 <sup>c</sup> | 5.0 <sup>d</sup> | 5.4 <sup>a</sup> | 4.9 <sup>e</sup> | 5.2 <sup>b</sup> | 5.0 <sup>d</sup> |
| 2,4-Hexadienal             | 5.4 <sup>c</sup>     | 5.6 <sup>b</sup> | 5.7 <sup>a</sup> | 5.7 <sup>a</sup> | 5.3 <sup>d</sup> | 4.9 <sup>f</sup> | 5.4 <sup>c</sup> | 4.9 <sup>f</sup> | 5.2 <sup>e</sup> | 5.2 <sup>e</sup> |
| 2-Heptenal                 | 5.5 <sup>b</sup>     | 5.4 <sup>c</sup> | 5.1 <sup>f</sup> | 5.2 <sup>e</sup> | 5.4 <sup>c</sup> | 5.2 <sup>e</sup> | 5.8 <sup>a</sup> | 5.1 <sup>f</sup> | 5.4 <sup>c</sup> | 5.3 <sup>d</sup> |
| 2-Octenal                  | 5.0 <sup>b</sup>     | 5.0 <sup>b</sup> | 4.6 <sup>d</sup> | 4.8 <sup>c</sup> | 5.1 <sup>a</sup> | 4.8 <sup>c</sup> | 5.0 <sup>a</sup> | 4.8 <sup>c</sup> | 5.1 <sup>b</sup> | 4.8 <sup>c</sup> |
| 2-Methyl-propanal          | 6.6 <sup>a</sup>     | 6.4 <sup>b</sup> | 5.9 <sup>f</sup> | 6.2 <sup>d</sup> | 6.3 <sup>c</sup> | 6.1 <sup>e</sup> | 6.6 <sup>a</sup> | 6.2 <sup>d</sup> | 6.2 <sup>d</sup> | 6.2 <sup>d</sup> |
| 3-Methyl-butanal           | 7.0 <sup>a</sup>     | 6.9 <sup>b</sup> | 6.6 <sup>e</sup> | 6.8 <sup>c</sup> | 6.8 <sup>c</sup> | 6.5 <sup>f</sup> | 7.0 <sup>a</sup> | 6.7 <sup>d</sup> | 6.7 <sup>d</sup> | 6.9 <sup>b</sup> |
| 2-Methyl-butanal           | 6.4 <sup>a</sup>     | 6.3 <sup>b</sup> | 6.0 <sup>e</sup> | 6.3 <sup>b</sup> | 6.2 <sup>c</sup> | 5.9 <sup>f</sup> | 6.4 <sup>a</sup> | 6.1 <sup>d</sup> | 6.1 <sup>d</sup> | 6.3 <sup>b</sup> |
| Benzaldehyde               | 6.8 <sup>c</sup>     | 6.7 <sup>d</sup> | 6.5 <sup>f</sup> | 6.8 <sup>c</sup> | 6.6 <sup>e</sup> | 6.3 <sup>h</sup> | 7.0 <sup>a</sup> | 6.4 <sup>g</sup> | 6.6 <sup>e</sup> | 6.9 <sup>b</sup> |
| Benzeneacetaldehyde        | 6.2 <sup>b</sup>     | 6.1 <sup>c</sup> | 5.8 <sup>f</sup> | 6.1 <sup>c</sup> | 6.0 <sup>d</sup> | 5.8 <sup>f</sup> | 6.3 <sup>a</sup> | 6.0 <sup>d</sup> | 5.9 <sup>e</sup> | 6.2 <sup>b</sup> |
| <i>Alcohols</i>            |                      |                  |                  |                  |                  |                  |                  |                  |                  |                  |
| Methanol                   | 5.2 <sup>c</sup>     | 5.3 <sup>c</sup> | 5.5 <sup>a</sup> | 5.3 <sup>c</sup> | 5.3 <sup>c</sup> | 5.0 <sup>d</sup> | 5.3 <sup>c</sup> | 5.4 <sup>b</sup> | 5.5 <sup>a</sup> | 5.2 <sup>c</sup> |
| Ethanol                    | 7.5 <sup>c</sup>     | 7.5 <sup>c</sup> | 7.3 <sup>e</sup> | 7.4 <sup>d</sup> | 7.6 <sup>b</sup> | 7.5 <sup>c</sup> | 7.5 <sup>c</sup> | 7.4 <sup>d</sup> | 7.7 <sup>a</sup> | 7.3 <sup>e</sup> |
| 1-Propanol                 | 5.9 <sup>e</sup>     | 6.1 <sup>c</sup> | 6.0 <sup>d</sup> | 6.0 <sup>d</sup> | 6.1 <sup>c</sup> | 6.2 <sup>b</sup> | 6.0 <sup>d</sup> | 6.0 <sup>d</sup> | 6.3 <sup>a</sup> | 6.1 <sup>c</sup> |
| 1-Butanol                  | 7.2 <sup>d</sup>     | 7.2 <sup>d</sup> | 7.5 <sup>b</sup> | 7.4 <sup>c</sup> | 7.4 <sup>c</sup> | 7.6 <sup>a</sup> | 7.4 <sup>c</sup> | 7.0 <sup>f</sup> | 7.4 <sup>c</sup> | 7.1 <sup>e</sup> |
| 1-Pentanol                 | 7.0 <sup>a</sup>     | 6.9 <sup>b</sup> | 6.7 <sup>d</sup> | 6.8 <sup>c</sup> | 7.0 <sup>a</sup> | 6.6 <sup>e</sup> | 6.9 <sup>b</sup> | 6.7 <sup>d</sup> | 6.7 <sup>d</sup> | 6.9 <sup>b</sup> |
| 1-Hexanol                  | 6.9 <sup>e</sup>     | 6.8 <sup>f</sup> | 7.3 <sup>b</sup> | 7.1 <sup>c</sup> | 7.1 <sup>c</sup> | 7.4 <sup>a</sup> | 7.3 <sup>b</sup> | 6.5 <sup>g</sup> | 7.0 <sup>d</sup> | 6.7 <sup>g</sup> |
| 1-Heptanol                 | 5.7 <sup>a</sup>     | 5.7 <sup>a</sup> | 5.5 <sup>c</sup> | 5.6 <sup>b</sup> | 5.6 <sup>b</sup> | 5.4 <sup>d</sup> | 5.5 <sup>c</sup> | 5.7 <sup>a</sup> | 5.7 <sup>a</sup> | 5.7 <sup>a</sup> |
| 1-Octen-3-ol               | 5.3 <sup>a</sup>     | 5.2 <sup>b</sup> | 4.8 <sup>f</sup> | 5.3 <sup>a</sup> | 5.0 <sup>d</sup> | 4.4 <sup>g</sup> | 4.9 <sup>e</sup> | 5.0 <sup>d</sup> | 4.9 <sup>e</sup> | 5.1 <sup>c</sup> |
| 2-Propanol                 | 7.7 <sup>b</sup>     | 7.7 <sup>b</sup> | 7.6 <sup>c</sup> | 7.7 <sup>b</sup> | 7.8 <sup>a</sup> | 7.6 <sup>c</sup> | 7.7 <sup>b</sup> | 7.6 <sup>c</sup> | 7.8 <sup>a</sup> | 7.5 <sup>d</sup> |
| 2-Butanol                  | 6.7 <sup>f</sup>     | 7.1 <sup>b</sup> | 6.8 <sup>e</sup> | 6.7 <sup>f</sup> | 7.0 <sup>c</sup> | 6.9 <sup>d</sup> | 6.7 <sup>f</sup> | 7.1 <sup>b</sup> | 7.3 <sup>a</sup> | 7.0 <sup>c</sup> |
| 2-Pentanol                 | 7.0 <sup>b</sup>     | 7.0 <sup>b</sup> | 7.1 <sup>a</sup> | 7.1 <sup>a</sup> | 7.1 <sup>a</sup> | 6.7 <sup>c</sup> | 7.0 <sup>b</sup> | 7.0 <sup>b</sup> | 7.1 <sup>a</sup> | 7.0 <sup>b</sup> |
| 2-Heptanol                 | 7.4 <sup>b</sup>     | 7.5 <sup>a</sup> | 7.5 <sup>a</sup> | 7.4 <sup>b</sup> | 7.5 <sup>a</sup> | 6.9 <sup>d</sup> | 7.2 <sup>c</sup> | 7.5 <sup>a</sup> | 7.4 <sup>b</sup> | 7.4 <sup>b</sup> |
| 2-Methyl-1-propanol        | 6.0 <sup>a</sup>     | 6.0 <sup>a</sup> | 5.9 <sup>b</sup> | 6.0 <sup>a</sup> | 6.0 <sup>a</sup> | 5.5 <sup>e</sup> | 5.7 <sup>d</sup> | 6.0 <sup>a</sup> | 5.8 <sup>c</sup> | 5.9 <sup>b</sup> |
| 3-Methyl-3-buten-1-ol      | 5.5 <sup>c</sup>     | 5.5 <sup>c</sup> | 5.5 <sup>c</sup> | 5.5 <sup>c</sup> | 5.6 <sup>b</sup> | 5.6 <sup>b</sup> | 5.6 <sup>b</sup> | 5.4 <sup>d</sup> | 5.7 <sup>a</sup> | 5.5 <sup>c</sup> |
| 3-Methyl-1-butanol         | 7.1 <sup>b</sup>     | 7.1 <sup>b</sup> | 7.1 <sup>b</sup> | 7.2 <sup>a</sup> | 7.1 <sup>b</sup> | 6.5 <sup>e</sup> | 6.7 <sup>f</sup> | 7.2 <sup>a</sup> | 6.9 <sup>d</sup> | 7.0 <sup>c</sup> |
| 2-Methyl-1-butanol         | 6.3 <sup>a</sup>     | 6.3 <sup>a</sup> | 6.3 <sup>a</sup> | 6.3 <sup>a</sup> | 6.3 <sup>a</sup> | 5.8 <sup>e</sup> | 5.9 <sup>d</sup> | 6.3 <sup>a</sup> | 6.1 <sup>c</sup> | 6.2 <sup>b</sup> |
| 2-Methyl-2-propanol        | 6.0 <sup>b</sup>     | 6.0 <sup>b</sup> | 6.1 <sup>a</sup> | 6.0 <sup>b</sup> | 6.0 <sup>b</sup> | 5.8 <sup>d</sup> | 5.9 <sup>c</sup> | 5.9 <sup>c</sup> | 5.9 <sup>c</sup> | 5.9 <sup>c</sup> |

|                           |                  |                  |                  |                  |                  |                  |                  |                  |                  |                  |
|---------------------------|------------------|------------------|------------------|------------------|------------------|------------------|------------------|------------------|------------------|------------------|
| <i>Alcohols</i>           |                  |                  |                  |                  |                  |                  |                  |                  |                  |                  |
| 3-Methyl-2-butanol        | 5.2 <sup>c</sup> | 5.3 <sup>b</sup> | 5.2 <sup>c</sup> | 5.3 <sup>b</sup> | 5.3 <sup>b</sup> | 5.1 <sup>d</sup> | 5.2 <sup>c</sup> | 5.3 <sup>b</sup> | 5.4 <sup>a</sup> | 5.3 <sup>b</sup> |
| 3-Methyl-2-pentanol       | 4.8 <sup>b</sup> | 4.1 <sup>d</sup> | 4.9 <sup>a</sup> | 4.9 <sup>a</sup> | 4.8 <sup>b</sup> | 4.5 <sup>d</sup> | 4.7 <sup>c</sup> | 4.8 <sup>b</sup> | 4.9 <sup>a</sup> | 4.8 <sup>b</sup> |
| 4-Methyl-2-pentanol       | 5.1 <sup>b</sup> | 5.5 <sup>a</sup> | 4.9 <sup>d</sup> | 5.0 <sup>c</sup> | 5.1 <sup>b</sup> | 4.6 <sup>d</sup> | 4.9 <sup>d</sup> | 4.9 <sup>d</sup> | 5.0 <sup>c</sup> | 4.9 <sup>d</sup> |
| <i>Ketones</i>            |                  |                  |                  |                  |                  |                  |                  |                  |                  |                  |
| 2-Propanone               | 7.8 <sup>b</sup> | 7.9 <sup>a</sup> | 7.6 <sup>d</sup> | 7.7 <sup>c</sup> | 7.8 <sup>b</sup> | 7.4 <sup>d</sup> | 7.7 <sup>c</sup> | 7.8 <sup>b</sup> | 7.8 <sup>b</sup> | 7.7 <sup>c</sup> |
| 2-Butanone                | 7.0 <sup>d</sup> | 7.3 <sup>b</sup> | 7.2 <sup>c</sup> | 7.0 <sup>d</sup> | 7.3 <sup>b</sup> | 7.2 <sup>c</sup> | 7.1 <sup>d</sup> | 7.3 <sup>b</sup> | 7.4 <sup>a</sup> | 7.2 <sup>c</sup> |
| 2-Pentanone               | 8.9 <sup>b</sup> | 9.0 <sup>a</sup> | 8.9 <sup>b</sup> | 9.0 <sup>a</sup> | 8.9 <sup>b</sup> | 8.6 <sup>d</sup> | 8.8 <sup>c</sup> | 9.0 <sup>a</sup> | 8.9 <sup>b</sup> | 9.0 <sup>a</sup> |
| 3-Hexanone                | 5.5 <sup>a</sup> | 5.4 <sup>b</sup> | 5.0 <sup>d</sup> | 5.3 <sup>c</sup> | 5.2 <sup>d</sup> | 4.5 <sup>f</sup> | 5.0 <sup>d</sup> | 5.4 <sup>b</sup> | 5.3 <sup>c</sup> | 5.3 <sup>c</sup> |
| 2-Hexanone                | 7.2 <sup>c</sup> | 7.4 <sup>a</sup> | 7.1 <sup>d</sup> | 7.3 <sup>b</sup> | 7.3 <sup>b</sup> | 6.5 <sup>f</sup> | 7.0 <sup>d</sup> | 7.3 <sup>b</sup> | 7.2 <sup>c</sup> | 7.3 <sup>b</sup> |
| 4-Heptanone               | 6.1 <sup>a</sup> | 6.0 <sup>b</sup> | 5.6 <sup>d</sup> | 5.8 <sup>c</sup> | 5.8 <sup>c</sup> | 4.9 <sup>d</sup> | 5.6 <sup>d</sup> | 6.0 <sup>b</sup> | 6.1 <sup>a</sup> | 6.0 <sup>b</sup> |
| 3-Heptanone               | 4.4 <sup>a</sup> | 4.3 <sup>b</sup> | 4.2 <sup>c</sup> | 4.4 <sup>a</sup> | 4.4 <sup>a</sup> | 4.0 <sup>d</sup> | 4.3 <sup>b</sup> | 4.2 <sup>c</sup> | 4.3 <sup>b</sup> | 4.3 <sup>b</sup> |
| 2-Heptanone               | 8.7 <sup>c</sup> | 8.9 <sup>a</sup> | 8.6 <sup>d</sup> | 8.8 <sup>b</sup> | 8.8 <sup>b</sup> | 8.0 <sup>f</sup> | 8.5 <sup>d</sup> | 8.8 <sup>b</sup> | 8.6 <sup>d</sup> | 8.7 <sup>c</sup> |
| 3-Octanone                | 5.4 <sup>b</sup> | 5.4 <sup>b</sup> | 5.1 <sup>d</sup> | 5.5 <sup>a</sup> | 5.3 <sup>c</sup> | 4.6 <sup>d</sup> | 5.1 <sup>d</sup> | 5.4 <sup>b</sup> | 5.4 <sup>b</sup> | 5.3 <sup>c</sup> |
| 2-Octanone                | 7.1 <sup>c</sup> | 7.3 <sup>a</sup> | 6.9 <sup>d</sup> | 7.1 <sup>c</sup> | 7.2 <sup>b</sup> | 6.2 <sup>g</sup> | 6.7 <sup>f</sup> | 7.2 <sup>b</sup> | 7.0 <sup>d</sup> | 7.0 <sup>d</sup> |
| 4-Nonanone                | 5.0 <sup>c</sup> | 5.1 <sup>b</sup> | 4.8 <sup>d</sup> | 4.8 <sup>d</sup> | 5.2 <sup>a</sup> | 4.7 <sup>f</sup> | 4.9 <sup>d</sup> | 4.8 <sup>d</sup> | 5.1 <sup>b</sup> | 4.8 <sup>d</sup> |
| 2-Nonanone                | 8.1 <sup>c</sup> | 8.3 <sup>a</sup> | 8.0 <sup>d</sup> | 8.2 <sup>b</sup> | 8.2 <sup>b</sup> | 7.3 <sup>g</sup> | 7.8 <sup>f</sup> | 8.3 <sup>a</sup> | 7.9 <sup>d</sup> | 8.1 <sup>c</sup> |
| 3-Buten-2-one             | 5.6 <sup>a</sup> | 5.6 <sup>a</sup> | 5.4 <sup>d</sup> | 5.4 <sup>d</sup> | 5.5 <sup>c</sup> | 5.3 <sup>d</sup> | 5.5 <sup>c</sup> | 5.4 <sup>d</sup> | 5.5 <sup>c</sup> | 5.5 <sup>c</sup> |
| 3-Penten-2-one            | 5.3 <sup>c</sup> | 5.5 <sup>a</sup> | 5.3 <sup>c</sup> | 5.4 <sup>b</sup> | 5.5 <sup>a</sup> | 5.0 <sup>d</sup> | 5.3 <sup>c</sup> | 5.4 <sup>b</sup> | 5.3 <sup>c</sup> | 5.4 <sup>b</sup> |
| 5-Hexen-2-one             | 5.9 <sup>c</sup> | 6.1 <sup>a</sup> | 5.7 <sup>d</sup> | 5.8 <sup>d</sup> | 5.9 <sup>c</sup> | 5.4 <sup>g</sup> | 5.6 <sup>f</sup> | 6.0 <sup>b</sup> | 6.1 <sup>a</sup> | 5.9 <sup>c</sup> |
| 6-Hepten-2-one            | 5.8 <sup>a</sup> | 5.8 <sup>a</sup> | 5.5 <sup>d</sup> | 5.7 <sup>b</sup> | 5.7 <sup>b</sup> | 4.5 <sup>f</sup> | 5.3 <sup>d</sup> | 5.8 <sup>a</sup> | 5.5 <sup>d</sup> | 5.6 <sup>c</sup> |
| 5-Hepten-2-one            | 4.2 <sup>f</sup> | 4.7 <sup>b</sup> | 4.3 <sup>d</sup> | 4.3 <sup>d</sup> | 4.6 <sup>c</sup> | 0.0 <sup>h</sup> | 3.9 <sup>g</sup> | 5.1 <sup>a</sup> | 4.6 <sup>c</sup> | 4.5 <sup>d</sup> |
| 1-Octen-3-one             | 5.5 <sup>b</sup> | 5.5 <sup>b</sup> | 5.3 <sup>d</sup> | 5.3 <sup>d</sup> | 5.4 <sup>c</sup> | 5.3 <sup>d</sup> | 5.6 <sup>a</sup> | 5.3 <sup>d</sup> | 5.5 <sup>b</sup> | 5.3 <sup>d</sup> |
| 8-Nonen-2-one             | 6.7 <sup>c</sup> | 6.9 <sup>a</sup> | 6.5 <sup>d</sup> | 6.7 <sup>c</sup> | 6.7 <sup>c</sup> | 5.7 <sup>g</sup> | 6.3 <sup>f</sup> | 6.8 <sup>b</sup> | 6.5 <sup>d</sup> | 6.6 <sup>d</sup> |
| 3-Hydroxy-2-butanone      | 5.9 <sup>b</sup> | 5.8 <sup>c</sup> | 5.7 <sup>d</sup> | 5.8 <sup>c</sup> | 5.6 <sup>d</sup> | 5.4 <sup>g</sup> | 5.5 <sup>f</sup> | 5.6 <sup>d</sup> | 6.0 <sup>a</sup> | 5.9 <sup>b</sup> |
| 2,3-Butanedione           | 7.5 <sup>b</sup> | 7.5 <sup>b</sup> | 7.5 <sup>b</sup> | 7.5 <sup>b</sup> | 7.5 <sup>b</sup> | 7.3 <sup>d</sup> | 7.4 <sup>c</sup> | 7.4 <sup>c</sup> | 7.5 <sup>b</sup> | 7.6 <sup>a</sup> |
| 2,3-Pentanedione          | 5.7 <sup>b</sup> | 5.7 <sup>b</sup> | 5.6 <sup>c</sup> | 5.7 <sup>b</sup> | 5.7 <sup>b</sup> | 5.5 <sup>d</sup> | 5.8 <sup>a</sup> | 5.5 <sup>d</sup> | 5.7 <sup>b</sup> | 5.7 <sup>b</sup> |
| 2,3-Hexanedione           | 4.4 <sup>d</sup> | 4.6 <sup>b</sup> | 4.4 <sup>d</sup> | 4.7 <sup>a</sup> | 4.6 <sup>b</sup> | 4.3 <sup>d</sup> | 4.6 <sup>b</sup> | 4.5 <sup>c</sup> | 4.4 <sup>d</sup> | 4.4 <sup>d</sup> |
| 2,3-Octanedione           | 5.8 <sup>a</sup> | 5.6 <sup>c</sup> | 5.4 <sup>d</sup> | 5.4 <sup>d</sup> | 5.6 <sup>c</sup> | 5.6 <sup>c</sup> | 5.8 <sup>a</sup> | 5.4 <sup>d</sup> | 5.7 <sup>b</sup> | 5.5 <sup>d</sup> |
| 3-Methyl-2-butanone       | 5.4 <sup>c</sup> | 5.6 <sup>a</sup> | 5.2 <sup>d</sup> | 5.4 <sup>c</sup> | 5.5 <sup>b</sup> | 4.8 <sup>f</sup> | 5.3 <sup>d</sup> | 5.5 <sup>b</sup> | 5.4 <sup>c</sup> | 5.4 <sup>c</sup> |
| 4-Methyl-2-pentanone      | 4.8 <sup>c</sup> | 5.0 <sup>a</sup> | 4.8 <sup>c</sup> | 4.8 <sup>c</sup> | 4.9 <sup>b</sup> | 4.4 <sup>d</sup> | 4.7 <sup>d</sup> | 4.9 <sup>b</sup> | 4.9 <sup>b</sup> | 4.8 <sup>c</sup> |
| 2-Methyl-3-pentanone      | 4.4 <sup>d</sup> | 4.5 <sup>c</sup> | 4.4 <sup>d</sup> | 4.3 <sup>d</sup> | 4.4 <sup>d</sup> | 4.1 <sup>f</sup> | 4.4 <sup>d</sup> | 4.6 <sup>b</sup> | 4.7 <sup>a</sup> | 4.5 <sup>c</sup> |
| 3-Methyl-2-pentanone      | 5.7 <sup>c</sup> | 5.9 <sup>a</sup> | 5.5 <sup>d</sup> | 5.7 <sup>c</sup> | 5.8 <sup>b</sup> | 4.8 <sup>g</sup> | 5.4 <sup>f</sup> | 5.8 <sup>b</sup> | 5.6 <sup>d</sup> | 5.7 <sup>c</sup> |
| 3-Methyl-2-heptanone      | 6.2 <sup>c</sup> | 6.5 <sup>a</sup> | 6.0 <sup>d</sup> | 5.6 <sup>f</sup> | 6.4 <sup>b</sup> | 5.0 <sup>h</sup> | 5.3 <sup>g</sup> | 6.4 <sup>b</sup> | 6.1 <sup>d</sup> | 5.6 <sup>f</sup> |
| 6-Methyl-3-heptanone      | 4.3 <sup>d</sup> | 4.4 <sup>c</sup> | 3.2 <sup>h</sup> | 6.2 <sup>a</sup> | 4.7 <sup>g</sup> | 0.0 <sup>i</sup> | 5.9 <sup>b</sup> | 4.2 <sup>d</sup> | 4.1 <sup>f</sup> | 6.2 <sup>a</sup> |
| 6-Methyl-2-heptanone      | 5.1 <sup>b</sup> | 5.2 <sup>a</sup> | 4.8 <sup>d</sup> | 4.0 <sup>g</sup> | 5.2 <sup>a</sup> | 4.6 <sup>d</sup> | 3.5 <sup>h</sup> | 5.1 <sup>b</sup> | 5.0 <sup>c</sup> | 4.2 <sup>f</sup> |
| 5-Methyl-2-heptanone      | 5.2 <sup>b</sup> | 5.4 <sup>a</sup> | 5.1 <sup>c</sup> | 5.0 <sup>d</sup> | 5.4 <sup>a</sup> | 4.1 <sup>f</sup> | 4.9 <sup>d</sup> | 5.4 <sup>a</sup> | 5.1 <sup>c</sup> | 5.0 <sup>d</sup> |
| Cyclopentanone            | 4.8 <sup>c</sup> | 4.7 <sup>d</sup> | 4.5 <sup>f</sup> | 5.3 <sup>a</sup> | 4.5 <sup>f</sup> | 4.4 <sup>g</sup> | 4.8 <sup>c</sup> | 4.6 <sup>d</sup> | 4.7 <sup>d</sup> | 5.2 <sup>b</sup> |
| 1-Phenyl-ethanone         | 5.6 <sup>b</sup> | 5.7 <sup>a</sup> | 5.3 <sup>d</sup> | 4.5 <sup>f</sup> | 5.6 <sup>b</sup> | 5.2 <sup>d</sup> | 4.5 <sup>f</sup> | 5.5 <sup>c</sup> | 5.7 <sup>a</sup> | 4.5 <sup>f</sup> |
| <i>Esters</i>             |                  |                  |                  |                  |                  |                  |                  |                  |                  |                  |
| Methyl acetate            | 5.3 <sup>c</sup> | 5.5 <sup>a</sup> | 5.2 <sup>d</sup> | 5.3 <sup>c</sup> | 5.4 <sup>b</sup> | 5.1 <sup>d</sup> | 5.3 <sup>c</sup> | 5.2 <sup>d</sup> | 5.2 <sup>d</sup> | 5.1 <sup>d</sup> |
| Methyl butanoate          | 6.4 <sup>b</sup> | 6.5 <sup>a</sup> | 6.4 <sup>b</sup> | 6.4 <sup>b</sup> | 6.5 <sup>a</sup> | 6.1 <sup>d</sup> | 6.3 <sup>c</sup> | 6.4 <sup>b</sup> | 6.3 <sup>c</sup> | 6.3 <sup>c</sup> |
| Methyl 3-methyl-butanoate | 4.4 <sup>c</sup> | 4.5 <sup>b</sup> | 4.2 <sup>d</sup> | 4.2 <sup>d</sup> | 4.2 <sup>d</sup> | 3.6 <sup>g</sup> | 3.8 <sup>f</sup> | 4.3 <sup>d</sup> | 4.6 <sup>a</sup> | 4.3 <sup>d</sup> |
| Methyl 2-methyl-butanoate | 4.3 <sup>c</sup> | 4.4 <sup>b</sup> | 4.1 <sup>d</sup> | 4.3 <sup>c</sup> | 4.4 <sup>b</sup> | 4.1 <sup>d</sup> | 4.2 <sup>d</sup> | 4.3 <sup>c</sup> | 4.7 <sup>a</sup> | 4.4 <sup>b</sup> |
| <i>Esters</i>             |                  |                  |                  |                  |                  |                  |                  |                  |                  |                  |
| Methyl pentanoate         | 4.7 <sup>c</sup> | 4.8 <sup>b</sup> | 4.7 <sup>c</sup> | 5.0 <sup>c</sup> | 4.8 <sup>b</sup> | 4.6 <sup>d</sup> | 4.7 <sup>c</sup> | 4.7 <sup>c</sup> | 4.6 <sup>d</sup> | 4.8 <sup>b</sup> |

|                                    |                  |                  |                  |                  |                  |                  |                  |                  |                  |                  |
|------------------------------------|------------------|------------------|------------------|------------------|------------------|------------------|------------------|------------------|------------------|------------------|
| Methyl hexanoate                   | 6.4 <sup>d</sup> | 6.7 <sup>c</sup> | 6.5 <sup>c</sup> | 6.6 <sup>b</sup> | 6.6 <sup>b</sup> | 6.2 <sup>f</sup> | 6.3 <sup>e</sup> | 6.5 <sup>c</sup> | 6.4 <sup>d</sup> | 6.5 <sup>c</sup> |
| Methyl octanoate                   | 5.5 <sup>d</sup> | 5.8 <sup>c</sup> | 5.6 <sup>c</sup> | 5.7 <sup>b</sup> | 5.7 <sup>b</sup> | 5.4 <sup>e</sup> | 5.5 <sup>d</sup> | 5.7 <sup>b</sup> | 5.6 <sup>c</sup> | 5.7 <sup>b</sup> |
| Methyl benzoate                    | 5.3 <sup>c</sup> | 5.3 <sup>c</sup> | 5.2 <sup>b</sup> | 5.3 <sup>c</sup> | 5.3 <sup>c</sup> | 5.3 <sup>c</sup> | 5.3 <sup>c</sup> | 5.3 <sup>c</sup> | 5.3 <sup>c</sup> | 5.3 <sup>c</sup> |
| Ethyl acetate                      | 6.3 <sup>b</sup> | 6.4 <sup>c</sup> | 6.3 <sup>b</sup> | 6.4 <sup>c</sup> | 6.4 <sup>c</sup> | 6.3 <sup>b</sup> | 6.4 <sup>c</sup> | 6.2 <sup>c</sup> | 6.3 <sup>b</sup> | 6.3 <sup>b</sup> |
| Ethyl propanoate                   | 4.3 <sup>d</sup> | 4.4 <sup>c</sup> | 4.4 <sup>c</sup> | 6.4 <sup>c</sup> | 4.5 <sup>b</sup> | 4.3 <sup>d</sup> | 4.4 <sup>c</sup> | 4.3 <sup>d</sup> | 4.4 <sup>c</sup> | 4.3 <sup>d</sup> |
| Ethyl 2-methyl-propionate          | 4.4 <sup>c</sup> | 4.5 <sup>b</sup> | 4.3 <sup>c</sup> | 6.4 <sup>c</sup> | 4.5 <sup>b</sup> | 4.1 <sup>e</sup> | 4.4 <sup>c</sup> | 4.3 <sup>c</sup> | 4.4 <sup>c</sup> | 4.4 <sup>c</sup> |
| Ethyl butanoate                    | 7.2 <sup>b</sup> | 7.2 <sup>b</sup> | 7.2 <sup>b</sup> | 6.4 <sup>c</sup> | 7.3 <sup>c</sup> | 7.3 <sup>c</sup> | 7.3 <sup>c</sup> | 7.1 <sup>c</sup> | 7.3 <sup>c</sup> | 7.2 <sup>b</sup> |
| Ethyl 2-butenolate                 | 4.2 <sup>b</sup> | 4.1 <sup>c</sup> | 3.7 <sup>f</sup> | 6.4 <sup>c</sup> | 4.0 <sup>c</sup> | 3.3 <sup>g</sup> | 3.2 <sup>h</sup> | 3.8 <sup>e</sup> | 3.8 <sup>e</sup> | 3.7 <sup>f</sup> |
| Ethyl 2-methyl-butanoate           | 4.3 <sup>c</sup> | 4.4 <sup>b</sup> | 4.1 <sup>e</sup> | 6.4 <sup>c</sup> | 4.3 <sup>c</sup> | 3.2 <sup>g</sup> | 3.9 <sup>f</sup> | 4.2 <sup>c</sup> | 4.2 <sup>c</sup> | 4.2 <sup>c</sup> |
| Ethyl 3-methyl-butanoate           | 4.3 <sup>c</sup> | 4.4 <sup>b</sup> | 4.2 <sup>c</sup> | 6.4 <sup>c</sup> | 4.3 <sup>c</sup> | 3.5 <sup>f</sup> | 4.1 <sup>e</sup> | 4.3 <sup>c</sup> | 4.3 <sup>c</sup> | 4.3 <sup>c</sup> |
| Ethyl pentanoate                   | 5.1 <sup>c</sup> | 5.1 <sup>c</sup> | 5.1 <sup>c</sup> | 6.4 <sup>c</sup> | 5.2 <sup>b</sup> | 5.2 <sup>b</sup> | 5.2 <sup>b</sup> | 5.0 <sup>c</sup> | 5.2 <sup>b</sup> | 5.1 <sup>c</sup> |
| Ethyl hexanoate                    | 7.0 <sup>c</sup> | 7.1 <sup>b</sup> | 7.1 <sup>b</sup> | 6.4 <sup>c</sup> | 7.1 <sup>b</sup> | 7.2 <sup>c</sup> | 7.1 <sup>b</sup> | 7.0 <sup>c</sup> | 7.2 <sup>c</sup> | 7.1 <sup>b</sup> |
| Ethyl heptanoate                   | 4.6 <sup>e</sup> | 4.8 <sup>c</sup> | 4.8 <sup>c</sup> | 6.4 <sup>c</sup> | 4.9 <sup>b</sup> | 4.9 <sup>b</sup> | 4.8 <sup>c</sup> | 4.7 <sup>c</sup> | 4.9 <sup>b</sup> | 4.8 <sup>c</sup> |
| Ethyl octanoate                    | 5.6 <sup>c</sup> | 5.8 <sup>b</sup> | 5.8 <sup>b</sup> | 5.8 <sup>b</sup> | 5.9 <sup>c</sup> | 5.9 <sup>c</sup> | 5.8 <sup>b</sup> | 5.7 <sup>c</sup> | 5.8 <sup>b</sup> | 5.9 <sup>c</sup> |
| Propyl acetate                     | 5.4 <sup>c</sup> | 5.6 <sup>b</sup> | 5.6 <sup>b</sup> | 5.7 <sup>c</sup> | 5.6 <sup>b</sup> | 5.2 <sup>f</sup> | 5.3 <sup>e</sup> | 5.5 <sup>c</sup> | 5.4 <sup>c</sup> | 5.4 <sup>c</sup> |
| Propyl butanoate                   | 5.0 <sup>e</sup> | 5.3 <sup>b</sup> | 5.1 <sup>c</sup> | 5.2 <sup>c</sup> | 5.2 <sup>c</sup> | 5.0 <sup>e</sup> | 5.1 <sup>c</sup> | 5.2 <sup>c</sup> | 5.5 <sup>c</sup> | 5.2 <sup>c</sup> |
| Propyl hexanoate                   | 4.4 <sup>c</sup> | 4.6 <sup>c</sup> | 4.5 <sup>b</sup> | 4.5 <sup>b</sup> | 4.5 <sup>b</sup> | 4.5 <sup>b</sup> | 4.4 <sup>c</sup> | 4.5 <sup>b</sup> | 4.6 <sup>c</sup> | 4.5 <sup>b</sup> |
| Butyl acetate                      | 5.7 <sup>c</sup> | 5.7 <sup>c</sup> | 6.2 <sup>c</sup> | 5.9 <sup>b</sup> | 5.9 <sup>b</sup> | 6.2 <sup>c</sup> | 6.1 <sup>b</sup> | 5.3 <sup>e</sup> | 5.7 <sup>c</sup> | 5.5 <sup>c</sup> |
| Butyl butanoate                    | 5.0 <sup>f</sup> | 5.1 <sup>e</sup> | 5.5 <sup>b</sup> | 5.3 <sup>c</sup> | 5.3 <sup>c</sup> | 5.5 <sup>b</sup> | 5.4 <sup>c</sup> | 5.1 <sup>e</sup> | 5.6 <sup>c</sup> | 4.9 <sup>g</sup> |
| Pentyl acetate                     | 4.9 <sup>b</sup> | 5.0 <sup>c</sup> | 4.8 <sup>c</sup> | 4.9 <sup>b</sup> | 4.9 <sup>b</sup> | 4.1 <sup>e</sup> | 4.5 <sup>c</sup> | 5.0 <sup>c</sup> | 4.8 <sup>c</sup> | 4.8 <sup>c</sup> |
| 2-Pentyl butanoate                 | 4.5 <sup>c</sup> | 4.8 <sup>b</sup> | 4.8 <sup>b</sup> | 3.9 <sup>f</sup> | 4.9 <sup>c</sup> | 4.2 <sup>e</sup> | 3.4 <sup>h</sup> | 4.7 <sup>c</sup> | 4.9 <sup>c</sup> | 3.6 <sup>g</sup> |
| Hexyl acetate                      | 4.1 <sup>c</sup> | 4.3 <sup>c</sup> | 4.2 <sup>b</sup> | 4.1 <sup>c</sup> | 4.3 <sup>c</sup> | 4.1 <sup>c</sup> | 4.2 <sup>b</sup> | 3.7 <sup>e</sup> | 4.2 <sup>b</sup> | 3.9 <sup>c</sup> |
| 3-Methyl-butyl acetate             | 5.3 <sup>b</sup> | 5.4 <sup>c</sup> | 5.4 <sup>c</sup> | 4.9 <sup>e</sup> | 5.3 <sup>b</sup> | 4.9 <sup>e</sup> | 4.9 <sup>e</sup> | 5.2 <sup>c</sup> | 5.1 <sup>c</sup> | 4.9 <sup>e</sup> |
| 2-Methyl-butyl acetate             | 4.9 <sup>c</sup> | 4.6 <sup>c</sup> | 4.4 <sup>e</sup> | 4.4 <sup>e</sup> | 4.7 <sup>b</sup> | 4.1 <sup>h</sup> | 4.0 <sup>g</sup> | 4.5 <sup>c</sup> | 4.6 <sup>c</sup> | 4.3 <sup>f</sup> |
| 1-Methyl-propyl butanoate          | 4.5 <sup>e</sup> | 4.9 <sup>c</sup> | 4.4 <sup>f</sup> | 5.4 <sup>c</sup> | 4.9 <sup>c</sup> | 4.3 <sup>g</sup> | 5.1 <sup>b</sup> | 4.7 <sup>c</sup> | 4.7 <sup>c</sup> | 5.1 <sup>b</sup> |
| 2-Methyl-propyl butanoate          | 5.2 <sup>b</sup> | 5.4 <sup>c</sup> | 5.1 <sup>c</sup> | 4.6 <sup>c</sup> | 5.4 <sup>c</sup> | 4.6 <sup>c</sup> | 4.5 <sup>e</sup> | 5.2 <sup>b</sup> | 5.1 <sup>c</sup> | 4.4 <sup>f</sup> |
| Isopropyl butanoate                | 5.0 <sup>c</sup> | 5.0 <sup>c</sup> | 4.9 <sup>b</sup> | 4.5 <sup>c</sup> | 5.0 <sup>c</sup> | 4.6 <sup>c</sup> | 4.2 <sup>e</sup> | 4.9 <sup>b</sup> | 5.0 <sup>c</sup> | 4.5 <sup>c</sup> |
| 2-Methyl-propyl acetate            | 4.5 <sup>c</sup> | 4.5 <sup>c</sup> | 4.2 <sup>g</sup> | 5.3 <sup>c</sup> | 4.4 <sup>e</sup> | 3.2 <sup>h</sup> | 5.0 <sup>c</sup> | 4.3 <sup>f</sup> | 4.4 <sup>e</sup> | 5.2 <sup>b</sup> |
| 3-Methyl-butyl butanoate           | 5.3 <sup>c</sup> | 5.5 <sup>c</sup> | 5.2 <sup>c</sup> | 5.4 <sup>b</sup> | 5.5 <sup>c</sup> | 4.8 <sup>e</sup> | 5.1 <sup>c</sup> | 5.4 <sup>b</sup> | 5.2 <sup>c</sup> | 5.2 <sup>c</sup> |
| 2-Methyl-butyl butanoate           | 4.8 <sup>c</sup> | 5.2 <sup>c</sup> | 4.6 <sup>e</sup> | 4.8 <sup>c</sup> | 5.0 <sup>b</sup> | 4.2 <sup>c</sup> | 4.5 <sup>f</sup> | 4.7 <sup>c</sup> | 4.8 <sup>c</sup> | 4.7 <sup>c</sup> |
| <i>Sulfur compounds</i>            |                  |                  |                  |                  |                  |                  |                  |                  |                  |                  |
| Methanethiol                       | 5.3 <sup>b</sup> | 4.9 <sup>c</sup> | 4.2 <sup>g</sup> | 4.7 <sup>c</sup> | 4.6 <sup>e</sup> | 4.5 <sup>f</sup> | 5.4 <sup>c</sup> | 4.5 <sup>f</sup> | 4.9 <sup>c</sup> | 4.9 <sup>c</sup> |
| Dimethyl-sulfide                   | 4.2 <sup>f</sup> | 4.9 <sup>b</sup> | 4.0 <sup>g</sup> | 4.7 <sup>c</sup> | 5.0 <sup>c</sup> | 4.4 <sup>e</sup> | 4.5 <sup>c</sup> | 4.0 <sup>g</sup> | 4.5 <sup>c</sup> | 4.0 <sup>g</sup> |
| Dimethyl-disulfide                 | 6.5 <sup>b</sup> | 6.3 <sup>c</sup> | 5.4 <sup>h</sup> | 6.0 <sup>e</sup> | 5.6 <sup>f</sup> | 5.3 <sup>i</sup> | 7.0 <sup>c</sup> | 5.5 <sup>g</sup> | 6.1 <sup>c</sup> | 6.0 <sup>e</sup> |
| Dimethyl-trisulfide                | 5.0 <sup>b</sup> | 4.4 <sup>c</sup> | 3.9 <sup>i</sup> | 4.1 <sup>g</sup> | 4.2 <sup>f</sup> | 4.0 <sup>h</sup> | 4.9 <sup>c</sup> | 4.0 <sup>h</sup> | 5.2 <sup>c</sup> | 4.3 <sup>e</sup> |
| 2,4-Dithiapentane                  | 4.1 <sup>c</sup> | 4.1 <sup>c</sup> | 4.1 <sup>c</sup> | 3.6 <sup>e</sup> | 4.1 <sup>c</sup> | 4.1 <sup>c</sup> | 4.5 <sup>c</sup> | 3.9 <sup>c</sup> | 4.2 <sup>b</sup> | 4.1 <sup>c</sup> |
| Methional                          | 5.1 <sup>c</sup> | 4.6 <sup>c</sup> | 3.9 <sup>g</sup> | 4.1 <sup>f</sup> | 4.2 <sup>e</sup> | 4.3 <sup>c</sup> | 4.1 <sup>f</sup> | 4.3 <sup>c</sup> | 4.8 <sup>b</sup> | 3.9 <sup>g</sup> |
| S-methyl thioacetate               | 4.7 <sup>c</sup> | 4.6 <sup>c</sup> | 4.7 <sup>c</sup> | 4.5 <sup>e</sup> | 4.6 <sup>c</sup> | 4.8 <sup>b</sup> | 5.2 <sup>c</sup> | 4.3 <sup>f</sup> | 4.7 <sup>c</sup> | 4.6 <sup>c</sup> |
| Thiophene                          | 5.4 <sup>c</sup> | 5.6 <sup>c</sup> | 5.4 <sup>c</sup> | 4.7 <sup>e</sup> | 5.5 <sup>b</sup> | 4.9 <sup>c</sup> | 4.9 <sup>c</sup> | 5.4 <sup>c</sup> | 5.5 <sup>b</sup> | 4.6 <sup>f</sup> |
| 2-Methyl-tetrahydro-thiophen-3-one | 4.5 <sup>c</sup> | 4.3 <sup>e</sup> | 4.1 <sup>g</sup> | 5.5 <sup>c</sup> | 4.2 <sup>f</sup> | 3.7 <sup>h</sup> | 5.4 <sup>b</sup> | 4.3 <sup>e</sup> | 4.6 <sup>c</sup> | 5.4 <sup>b</sup> |
| Methyl isothiocyanate              | 6.0 <sup>c</sup> | 5.5 <sup>b</sup> | 4.6 <sup>f</sup> | 4.3 <sup>g</sup> | 5.1 <sup>c</sup> | 4.7 <sup>e</sup> | 4.1 <sup>h</sup> | 4.7 <sup>e</sup> | 5.3 <sup>c</sup> | 4.3 <sup>g</sup> |
| <i>Furans</i>                      |                  |                  |                  |                  |                  |                  |                  |                  |                  |                  |
| 2-Methyl-furan                     | 5.2 <sup>a</sup> | 5.1 <sup>b</sup> | 4.9 <sup>c</sup> | 5.1 <sup>b</sup> | 5.1 <sup>b</sup> | 4.7 <sup>e</sup> | 5.0 <sup>c</sup> | 5.0 <sup>c</sup> | 5.0 <sup>c</sup> | 5.1 <sup>b</sup> |
| 2-Ethyl-furan                      | 5.7 <sup>b</sup> | 5.7 <sup>c</sup> | 5.6 <sup>c</sup> | 5.6 <sup>c</sup> | 5.8 <sup>a</sup> | 5.6 <sup>c</sup> | 5.8 <sup>a</sup> | 5.6 <sup>c</sup> | 5.8 <sup>a</sup> | 5.7 <sup>b</sup> |
| 2-Propyl-furan                     | 4.7 <sup>b</sup> | 4.8 <sup>a</sup> | 4.6 <sup>c</sup> | 4.6 <sup>c</sup> | 4.8 <sup>a</sup> | 4.7 <sup>b</sup> | 4.7 <sup>b</sup> | 4.8 <sup>a</sup> | 4.7 <sup>b</sup> | 4.7 <sup>b</sup> |
| 3-Methyl-furan                     | 4.7 <sup>a</sup> | 4.6 <sup>b</sup> | 4.4 <sup>c</sup> | 4.6 <sup>b</sup> | 4.6 <sup>b</sup> | 4.4 <sup>c</sup> | 4.7 <sup>a</sup> | 4.6 <sup>b</sup> | 4.5 <sup>c</sup> | 4.7 <sup>a</sup> |
| 2,4-Dimethyl-furan                 | 4.7 <sup>c</sup> | 4.6 <sup>c</sup> | 4.5 <sup>e</sup> | 4.6 <sup>c</sup> | 4.6 <sup>c</sup> | 4.4 <sup>f</sup> | 4.3 <sup>g</sup> | 5.3 <sup>a</sup> | 4.8 <sup>b</sup> | 4.7 <sup>c</sup> |

|                       |                           |                  |                  |                  |                  |                  |                  |                  |                  |                  |
|-----------------------|---------------------------|------------------|------------------|------------------|------------------|------------------|------------------|------------------|------------------|------------------|
| 2,5-Dimethyl-furan    | 4.6 <sup>c</sup>          | 4.7 <sup>b</sup> | 4.7 <sup>b</sup> | 4.7 <sup>b</sup> | 4.7 <sup>b</sup> | 4.5 <sup>c</sup> | 3.9 <sup>e</sup> | 4.8 <sup>a</sup> | 4.7 <sup>b</sup> | 4.7 <sup>b</sup> |
| Furfural              | 5.0 <sup>a</sup>          | 4.8 <sup>c</sup> | 4.6 <sup>c</sup> | 4.9 <sup>b</sup> | 4.9 <sup>b</sup> | 4.6 <sup>c</sup> | 4.9 <sup>b</sup> | 4.8 <sup>c</sup> | 4.6 <sup>c</sup> | 4.8 <sup>c</sup> |
|                       | <b>Pecorino Siciliano</b> |                  |                  |                  |                  |                  |                  |                  |                  |                  |
| <i>Aldehydes</i>      |                           |                  |                  |                  |                  |                  |                  |                  |                  |                  |
| Acetaldehyde          | 5.9 <sup>d</sup>          | 6.0 <sup>c</sup> | 6.4 <sup>a</sup> | 6.2 <sup>b</sup> | 6.0 <sup>c</sup> | 6.0 <sup>c</sup> | 6.2 <sup>b</sup> | 5.9 <sup>d</sup> | 6.0 <sup>c</sup> | 6.0 <sup>c</sup> |
| Butanal               | 5.9 <sup>g</sup>          | 6.1 <sup>e</sup> | 6.4 <sup>b</sup> | 6.2 <sup>d</sup> | 6.0              | 6.6 <sup>a</sup> | 6.3 <sup>c</sup> | 5.7 <sup>i</sup> | 6.0 <sup>f</sup> | 5.8 <sup>h</sup> |
| Pentanal              | 6.3 <sup>f</sup>          | 6.8 <sup>b</sup> | 6.6 <sup>d</sup> | 6.2 <sup>g</sup> | 6.3 <sup>f</sup> | 6.4 <sup>e</sup> | 7.1 <sup>a</sup> | 6.3 <sup>f</sup> | 6.4 <sup>c</sup> | 6.7 <sup>c</sup> |
| Hexanal               | 6.5 <sup>c</sup>          | 6.6 <sup>b</sup> | 6.6 <sup>b</sup> | 6.2 <sup>e</sup> | 6.5 <sup>c</sup> | 6.7 <sup>a</sup> | 6.7 <sup>a</sup> | 6.5 <sup>c</sup> | 6.6 <sup>b</sup> | 6.3 <sup>d</sup> |
| Heptanal              | 5.4 <sup>f</sup>          | 5.7 <sup>c</sup> | 5.7 <sup>c</sup> | 6.2 <sup>a</sup> | 5.3 <sup>g</sup> | 5.3 <sup>g</sup> | 6.0 <sup>b</sup> | 5.4 <sup>f</sup> | 5.5 <sup>e</sup> | 5.6 <sup>d</sup> |
| Octanal               | 5.6 <sup>e</sup>          | 5.8 <sup>d</sup> | 5.9 <sup>c</sup> | 6.2 <sup>a</sup> | 5.5 <sup>f</sup> | 5.8 <sup>d</sup> | 6.0 <sup>b</sup> | 5.4 <sup>g</sup> | 5.6 <sup>e</sup> | 5.6 <sup>e</sup> |
| Nonanal               | 6.2 <sup>b</sup>          | 6.3 <sup>a</sup> | 6.2 <sup>b</sup> | 6.2 <sup>b</sup> | 5.9 <sup>e</sup> | 5.9 <sup>e</sup> | 6.3 <sup>a</sup> | 5.9 <sup>e</sup> | 6.0 <sup>d</sup> | 6.1 <sup>c</sup> |
| Decanal               | 4.5 <sup>e</sup>          | 4.7 <sup>c</sup> | 4.5 <sup>e</sup> | 6.2 <sup>a</sup> | 4.3 <sup>f</sup> | 4.5 <sup>e</sup> | 4.8 <sup>b</sup> | 4.2 <sup>g</sup> | 4.6 <sup>d</sup> | 4.5 <sup>e</sup> |
| Propenal              | 5.4 <sup>f</sup>          | 5.7 <sup>d</sup> | 6.0 <sup>b</sup> | 6.2 <sup>a</sup> | 5.5 <sup>e</sup> | 6.0 <sup>b</sup> | 5.8 <sup>c</sup> | 5.1 <sup>h</sup> | 5.7 <sup>d</sup> | 5.2 <sup>g</sup> |
| 2-Pentenal            | 5.0 <sup>d</sup>          | 5.3 <sup>c</sup> | 5.4 <sup>h</sup> | 6.2 <sup>a</sup> | 4.8 <sup>f</sup> | 4.9 <sup>e</sup> | 5.8 <sup>b</sup> | 4.7 <sup>g</sup> | 5.0 <sup>d</sup> | 5.0 <sup>d</sup> |
| 2-Hexenal             | 4.8 <sup>d</sup>          | 5.1 <sup>c</sup> | 5.1 <sup>c</sup> | 6.2 <sup>a</sup> | 4.7 <sup>e</sup> | 4.7 <sup>e</sup> | 5.5 <sup>b</sup> | 4.6 <sup>f</sup> | 4.8 <sup>d</sup> | 4.8 <sup>d</sup> |
| 2,4-Hexadienal        | 4.4 <sup>f</sup>          | 4.7 <sup>c</sup> | 4.6 <sup>d</sup> | 6.2 <sup>a</sup> | 4.6 <sup>d</sup> | 4.0 <sup>g</sup> | 5.1 <sup>b</sup> | 4.0 <sup>g</sup> | 4.5 <sup>e</sup> | 4.5 <sup>e</sup> |
| 2-Heptenal            | 5.0 <sup>e</sup>          | 5.4 <sup>c</sup> | 5.4 <sup>c</sup> | 6.2 <sup>a</sup> | 4.8 <sup>f</sup> | 4.8 <sup>f</sup> | 5.9 <sup>b</sup> | 4.8 <sup>f</sup> | 5.1 <sup>d</sup> | 5.1 <sup>d</sup> |
| 2-Octenal             | 4.8 <sup>e</sup>          | 5.1 <sup>c</sup> | 5.1 <sup>c</sup> | 6.2 <sup>a</sup> | 4.5 <sup>h</sup> | 4.7 <sup>f</sup> | 5.6 <sup>b</sup> | 4.6 <sup>g</sup> | 4.9 <sup>d</sup> | 4.7 <sup>f</sup> |
| 2-Methyl-propanal     | 6.0 <sup>e</sup>          | 6.4 <sup>c</sup> | 6.5 <sup>b</sup> | 6.2 <sup>d</sup> | 6.0 <sup>e</sup> | 5.8 <sup>g</sup> | 6.6 <sup>a</sup> | 5.9 <sup>f</sup> | 6.0 <sup>e</sup> | 6.2 <sup>d</sup> |
| 3-Methyl-butanal      | 6.2 <sup>e</sup>          | 6.6 <sup>b</sup> | 6.5 <sup>c</sup> | 6.2 <sup>e</sup> | 6.2 <sup>e</sup> | 6.1 <sup>f</sup> | 6.8 <sup>a</sup> | 6.3 <sup>d</sup> | 6.6 <sup>b</sup> | 6.5 <sup>c</sup> |
| 2-Methyl-butanal      | 6.2 <sup>e</sup>          | 6.6 <sup>b</sup> | 6.5 <sup>c</sup> | 6.2 <sup>e</sup> | 6.2 <sup>e</sup> | 6.2 <sup>e</sup> | 6.7 <sup>a</sup> | 6.2 <sup>e</sup> | 6.4 <sup>d</sup> | 6.4 <sup>d</sup> |
| Benzaldehyde          | 6.4 <sup>e</sup>          | 6.8 <sup>b</sup> | 6.7 <sup>c</sup> | 6.2 <sup>f</sup> | 6.2 <sup>f</sup> | 6.2 <sup>f</sup> | 6.9 <sup>a</sup> | 6.2 <sup>f</sup> | 6.6 <sup>d</sup> | 6.6 <sup>d</sup> |
| Benzeneacetaldehyde   | 5.6 <sup>e</sup>          | 6.1 <sup>c</sup> | 6.1 <sup>c</sup> | 6.2 <sup>b</sup> | 5.3 <sup>f</sup> | 5.6 <sup>e</sup> | 6.4 <sup>a</sup> | 5.2 <sup>h</sup> | 5.8 <sup>d</sup> | 5.4 <sup>g</sup> |
| <i>Alcohols</i>       |                           |                  |                  |                  |                  |                  |                  |                  |                  |                  |
| Methanol              | 4.7 <sup>g</sup>          | 4.8 <sup>f</sup> | 4.9 <sup>e</sup> | 4.9 <sup>e</sup> | 5.9 <sup>a</sup> | 5.4 <sup>b</sup> | 5.0 <sup>d</sup> | 5.1 <sup>c</sup> | 5.0 <sup>d</sup> | 5.1 <sup>c</sup> |
| Ethanol               | 6.9 <sup>c</sup>          | 7.0 <sup>b</sup> | 7.1 <sup>a</sup> | 7.0 <sup>b</sup> | 7.0 <sup>b</sup> | 7.1 <sup>a</sup> | 6.9 <sup>c</sup> | 7.0 <sup>b</sup> | 7.1 <sup>a</sup> | 6.9 <sup>c</sup> |
| 1-Propanol            | 6.6 <sup>e</sup>          | 6.6 <sup>e</sup> | 7.0 <sup>b</sup> | 6.6 <sup>e</sup> | 6.7 <sup>d</sup> | 7.1 <sup>a</sup> | 6.6 <sup>e</sup> | 6.3 <sup>f</sup> | 6.8 <sup>c</sup> | 6.2 <sup>g</sup> |
| 1-Butanol             | 7.1 <sup>f</sup>          | 7.1 <sup>f</sup> | 7.5 <sup>b</sup> | 7.3 <sup>d</sup> | 7.3 <sup>d</sup> | 7.8 <sup>a</sup> | 7.2 <sup>e</sup> | 6.8 <sup>g</sup> | 7.4 <sup>c</sup> | 6.7 <sup>h</sup> |
| 1-Pentanol            | 6.4 <sup>e</sup>          | 6.6 <sup>c</sup> | 6.4 <sup>e</sup> | 6.5 <sup>d</sup> | 6.3 <sup>f</sup> | 6.3 <sup>f</sup> | 6.8 <sup>b</sup> | 6.8 <sup>b</sup> | 7.1 <sup>a</sup> | 6.8 <sup>b</sup> |
| 1-Hexanol             | 6.8 <sup>e</sup>          | 6.7 <sup>f</sup> | 7.0 <sup>c</sup> | 6.7 <sup>f</sup> | 6.9 <sup>d</sup> | 7.6 <sup>a</sup> | 6.9 <sup>d</sup> | 6.5 <sup>g</sup> | 7.1 <sup>b</sup> | 6.4 <sup>h</sup> |
| 1-Heptanol            | 5.8 <sup>e</sup>          | 5.9 <sup>d</sup> | 5.7 <sup>f</sup> | 5.8 <sup>e</sup> | 5.6 <sup>g</sup> | 5.7 <sup>f</sup> | 5.9 <sup>d</sup> | 6.2 <sup>b</sup> | 6.5 <sup>a</sup> | 6.1 <sup>c</sup> |
| 1-Octen-3-ol          | 4.3 <sup>e</sup>          | 4.5 <sup>d</sup> | 4.3 <sup>e</sup> | 4.3 <sup>e</sup> | 4.3 <sup>e</sup> | 4.1 <sup>f</sup> | 4.7 <sup>b</sup> | 4.5 <sup>d</sup> | 4.9 <sup>a</sup> | 4.6 <sup>c</sup> |
| 2-Propanol            | 7.3 <sup>d</sup>          | 7.2 <sup>e</sup> | 7.4 <sup>c</sup> | 7.2 <sup>e</sup> | 7.3 <sup>d</sup> | 7.6 <sup>b</sup> | 7.2 <sup>e</sup> | 7.4 <sup>c</sup> | 7.7 <sup>a</sup> | 7.0 <sup>f</sup> |
| 2-Butanol             | 7.9 <sup>f</sup>          | 7.9 <sup>f</sup> | 8.3 <sup>b</sup> | 7.8 <sup>g</sup> | 8.1 <sup>d</sup> | 8.5 <sup>a</sup> | 8.0 <sup>e</sup> | 7.6 <sup>h</sup> | 8.2 <sup>c</sup> | 7.5 <sup>i</sup> |
| 2-Pentanol            | 6.7 <sup>d</sup>          | 6.6 <sup>e</sup> | 6.5 <sup>f</sup> | 6.3 <sup>g</sup> | 6.8 <sup>c</sup> | 6.7 <sup>d</sup> | 6.7 <sup>d</sup> | 7.0 <sup>b</sup> | 7.1 <sup>a</sup> | 6.5 <sup>f</sup> |
| <i>Alcohols</i>       |                           |                  |                  |                  |                  |                  |                  |                  |                  |                  |
| 2-Heptanol            | 7.2 <sup>d</sup>          | 7.3 <sup>c</sup> | 7.1 <sup>e</sup> | 6.9 <sup>f</sup> | 7.3 <sup>c</sup> | 7.1 <sup>e</sup> | 7.3 <sup>c</sup> | 7.7 <sup>a</sup> | 7.6 <sup>b</sup> | 7.3 <sup>c</sup> |
| 2-Methyl-1-propanol   | 5.6 <sup>b</sup>          | 5.7 <sup>a</sup> | 5.6 <sup>b</sup> | 5.5 <sup>c</sup> | 5.5 <sup>c</sup> | 5.5 <sup>c</sup> | 5.6 <sup>b</sup> | 5.4 <sup>d</sup> | 5.5 <sup>c</sup> | 5.4 <sup>d</sup> |
| 3-Methyl-3-buten-1-ol | 5.4 <sup>b</sup>          | 5.3 <sup>c</sup> | 5.4 <sup>b</sup> | 5.3 <sup>c</sup> | 5.4 <sup>b</sup> | 5.5 <sup>a</sup> | 5.4 <sup>b</sup> | 5.3 <sup>c</sup> | 5.5 <sup>a</sup> | 5.2 <sup>d</sup> |
| 3-Methyl-1-butanol    | 7.0 <sup>b</sup>          | 7.1 <sup>a</sup> | 7.0 <sup>b</sup> | 7.0 <sup>b</sup> | 6.9 <sup>c</sup> | 6.8 <sup>d</sup> | 7.0 <sup>b</sup> | 6.7 <sup>e</sup> | 6.8 <sup>d</sup> | 6.7 <sup>e</sup> |
| 2-Methyl-1-butanol    | 6.2 <sup>b</sup>          | 6.3 <sup>a</sup> | 6.3 <sup>a</sup> | 6.2 <sup>b</sup> | 6.0 <sup>d</sup> | 6.2 <sup>b</sup> | 6.1 <sup>c</sup> | 6.0 <sup>d</sup> | 6.1 <sup>c</sup> | 5.9 <sup>e</sup> |
| 2-Methyl-2-propanol   | 5.3 <sup>b</sup>          | 5.3 <sup>b</sup> | 5.3 <sup>b</sup> | 4.8 <sup>f</sup> | 5.1 <sup>d</sup> | 5.2 <sup>c</sup> | 5.0 <sup>e</sup> | 5.5 <sup>a</sup> | 5.3 <sup>b</sup> | 5.2 <sup>c</sup> |
| 3-Methyl-2-butanol    | 5.1 <sup>c</sup>          | 5.1 <sup>c</sup> | 5.1 <sup>c</sup> | 5.0 <sup>d</sup> | 5.0 <sup>d</sup> | 5.3 <sup>a</sup> | 5.1 <sup>c</sup> | 5.2 <sup>b</sup> | 5.2 <sup>b</sup> | 4.9 <sup>e</sup> |
| 3-Methyl-2-pentanol   | 4.7 <sup>d</sup>          | 4.7 <sup>d</sup> | 4.4 <sup>f</sup> | 4.6 <sup>e</sup> | 4.6 <sup>e</sup> | 4.1 <sup>g</sup> | 4.7 <sup>d</sup> | 5.3 <sup>a</sup> | 5.1 <sup>b</sup> | 4.9 <sup>c</sup> |
| 4-Methyl-2-pentanol   | 4.8 <sup>d</sup>          | 4.9 <sup>c</sup> | 4.9 <sup>c</sup> | 4.8 <sup>d</sup> | 4.8 <sup>d</sup> | 4.9 <sup>c</sup> | 5.0 <sup>b</sup> | 5.4 <sup>a</sup> | 4.9 <sup>c</sup> | 5.4 <sup>a</sup> |
| 2-Propanone           | 7.6 <sup>d</sup>          | 7.6 <sup>d</sup> | 7.4 <sup>e</sup> | 7.4 <sup>e</sup> | 7.4 <sup>e</sup> | 6.8 <sup>f</sup> | 7.7 <sup>c</sup> | 7.7 <sup>c</sup> | 7.9 <sup>a</sup> | 7.8 <sup>b</sup> |
| 2-Butanone            | 7.8 <sup>b</sup>          | 7.8 <sup>b</sup> | 7.9 <sup>a</sup> | 7.7 <sup>c</sup> | 7.8 <sup>b</sup> | 7.7 <sup>c</sup> | 7.8 <sup>b</sup> | 7.6 <sup>c</sup> | 7.9 <sup>a</sup> | 7.6 <sup>c</sup> |
| 2-Pentanone           | 8.8 <sup>d</sup>          | 8.9 <sup>c</sup> | 8.5 <sup>f</sup> | 8.6 <sup>e</sup> | 8.8 <sup>d</sup> | 7.6 <sup>g</sup> | 8.9 <sup>c</sup> | 8.9 <sup>c</sup> | 9.1 <sup>a</sup> | 9.0 <sup>b</sup> |

|                           |                  |                  |                  |                  |                  |                  |                  |                  |                  |                  |
|---------------------------|------------------|------------------|------------------|------------------|------------------|------------------|------------------|------------------|------------------|------------------|
| <i>Ketones</i>            |                  |                  |                  |                  |                  |                  |                  |                  |                  |                  |
| 3-Hexanone                | 5.2 <sup>c</sup> | 5.4 <sup>a</sup> | 5.3 <sup>b</sup> | 5.3 <sup>b</sup> | 5.1 <sup>d</sup> | 4.6 <sup>e</sup> | 5.2 <sup>c</sup> | 5.2 <sup>c</sup> | 5.3 <sup>b</sup> | 5.3 <sup>b</sup> |
| 2-Hexanone                | 4.8 <sup>f</sup> | 5.1 <sup>d</sup> | 5.1 <sup>d</sup> | 4.8 <sup>f</sup> | 4.9 <sup>e</sup> | 5.2 <sup>c</sup> | 7.0 <sup>b</sup> | 4.9 <sup>e</sup> | 5.1 <sup>c</sup> | 7.3 <sup>a</sup> |
| 4-Heptanone               | 4.2 <sup>e</sup> | 4.4 <sup>c</sup> | 4.4 <sup>c</sup> | 4.4 <sup>c</sup> | 4.2 <sup>e</sup> | 4.2 <sup>e</sup> | 5.0 <sup>a</sup> | 4.3 <sup>d</sup> | 4.6 <sup>b</sup> | 5.0 <sup>a</sup> |
| 3-Heptanone               | 8.5 <sup>d</sup> | 8.6 <sup>c</sup> | 8.1 <sup>g</sup> | 8.3 <sup>f</sup> | 8.4 <sup>e</sup> | 7.3 <sup>h</sup> | 4.4 <sup>j</sup> | 8.7 <sup>b</sup> | 8.9 <sup>a</sup> | 4.5 <sup>i</sup> |
| 2-Heptanone               | 4.9 <sup>g</sup> | 5.2 <sup>d</sup> | 4.9 <sup>g</sup> | 4.9 <sup>g</sup> | 5.0 <sup>f</sup> | 4.7 <sup>h</sup> | 8.5 <sup>b</sup> | 5.1 <sup>e</sup> | 5.3 <sup>c</sup> | 8.7 <sup>a</sup> |
| 3-Octanone                | 6.8 <sup>c</sup> | 6.8 <sup>c</sup> | 6.3 <sup>f</sup> | 6.5 <sup>e</sup> | 6.6 <sup>d</sup> | 5.6 <sup>g</sup> | 5.1 <sup>h</sup> | 7.1 <sup>b</sup> | 7.4 <sup>a</sup> | 5.1 <sup>h</sup> |
| 2-Octanone                | 4.7 <sup>e</sup> | 5.1 <sup>c</sup> | 4.8 <sup>d</sup> | 4.5 <sup>f</sup> | 4.4 <sup>g</sup> | 4.7 <sup>e</sup> | 6.8 <sup>b</sup> | 4.4 <sup>g</sup> | 4.7 <sup>e</sup> | 7.1 <sup>a</sup> |
| 4-Nonanone                | 8.1 <sup>c</sup> | 8.1 <sup>c</sup> | 7.6 <sup>f</sup> | 7.7 <sup>e</sup> | 7.9 <sup>d</sup> | 7.1 <sup>g</sup> | 5.0 <sup>h</sup> | 8.4 <sup>b</sup> | 8.7 <sup>a</sup> | 4.4 <sup>i</sup> |
| 2-Nonanone                | 5.4 <sup>e</sup> | 5.6 <sup>c</sup> | 5.4 <sup>e</sup> | 5.5 <sup>d</sup> | 5.3 <sup>f</sup> | 5.3 <sup>f</sup> | 8.1 <sup>b</sup> | 5.3 <sup>f</sup> | 5.5 <sup>d</sup> | 8.4 <sup>a</sup> |
| 3-Buten-2-one             | 5.2 <sup>d</sup> | 5.2 <sup>d</sup> | 4.9 <sup>e</sup> | 4.9 <sup>e</sup> | 4.9 <sup>e</sup> | 4.7 <sup>f</sup> | 5.6 <sup>a</sup> | 5.2 <sup>d</sup> | 5.3 <sup>c</sup> | 5.5 <sup>b</sup> |
| 3-Penten-2-one            | 5.6 <sup>c</sup> | 5.6 <sup>c</sup> | 5.3 <sup>e</sup> | 5.3 <sup>e</sup> | 5.5 <sup>d</sup> | 5.1 <sup>g</sup> | 5.2 <sup>f</sup> | 6.1 <sup>b</sup> | 6.7 <sup>a</sup> | 5.3 <sup>e</sup> |
| 5-Hexen-2-one             | 6.2 <sup>b</sup> | 5.9 <sup>c</sup> | 5.4 <sup>f</sup> | 5.5 <sup>e</sup> | 5.5 <sup>e</sup> | 4.5 <sup>g</sup> | 5.6 <sup>d</sup> | 6.4 <sup>a</sup> | 6.4 <sup>a</sup> | 6.2 <sup>b</sup> |
| 6-Hepten-2-one            | 4.8 <sup>e</sup> | 4.4 <sup>f</sup> | 3.2 <sup>i</sup> | 3.6 <sup>h</sup> | 4.0 <sup>g</sup> | 0.0 <sup>j</sup> | 5.8 <sup>b</sup> | 4.9 <sup>d</sup> | 5.0 <sup>c</sup> | 5.9 <sup>a</sup> |
| 5-Hepten-2-one            | 4.9 <sup>c</sup> | 5.1 <sup>a</sup> | 5.0 <sup>b</sup> | 5.1 <sup>a</sup> | 4.9 <sup>c</sup> | 4.8 <sup>d</sup> | 4.2 <sup>f</sup> | 4.7 <sup>e</sup> | 5.1 <sup>a</sup> | 5.0 <sup>b</sup> |
| 1-Octen-3-one             | 6.6 <sup>d</sup> | 6.7 <sup>c</sup> | 6.1 <sup>g</sup> | 6.2 <sup>f</sup> | 6.4 <sup>e</sup> | 5.3 <sup>i</sup> | 5.3 <sup>i</sup> | 6.9 <sup>b</sup> | 7.2 <sup>a</sup> | 5.0 <sup>h</sup> |
| 8-Nonen-2-one             | 5.4 <sup>f</sup> | 5.6 <sup>d</sup> | 5.2 <sup>g</sup> | 5.5 <sup>e</sup> | 5.2 <sup>g</sup> | 4.4 <sup>h</sup> | 6.6 <sup>b</sup> | 5.2 <sup>g</sup> | 5.7 <sup>c</sup> | 6.9 <sup>a</sup> |
| 3-Hydroxy-2-butanone      | 7.0 <sup>c</sup> | 7.1 <sup>b</sup> | 7.0 <sup>c</sup> | 7.1 <sup>b</sup> | 6.8 <sup>d</sup> | 6.7 <sup>e</sup> | 5.6 <sup>f</sup> | 7.1 <sup>b</sup> | 7.2 <sup>a</sup> | 5.2 <sup>g</sup> |
| 2,3-Butanedione           | 6.1 <sup>c</sup> | 6.1 <sup>c</sup> | 6.0 <sup>d</sup> | 6.1 <sup>c</sup> | 6.0 <sup>d</sup> | 5.6 <sup>e</sup> | 7.0 <sup>b</sup> | 6.0 <sup>d</sup> | 6.0 <sup>d</sup> | 7.3 <sup>a</sup> |
| 2,3-Pentanedione          | 4.2 <sup>f</sup> | 4.1 <sup>g</sup> | 4.5 <sup>c</sup> | 4.4 <sup>d</sup> | 4.2 <sup>f</sup> | 4.3 <sup>e</sup> | 6.2 <sup>a</sup> | 4.2 <sup>f</sup> | 4.4 <sup>d</sup> | 6.1 <sup>b</sup> |
| 2,3-Hexanedione           | 5.2 <sup>c</sup> | 5.5 <sup>a</sup> | 5.3 <sup>b</sup> | 5.3 <sup>b</sup> | 4.9 <sup>e</sup> | 4.9 <sup>e</sup> | 4.4 <sup>f</sup> | 5.0 <sup>d</sup> | 5.2 <sup>c</sup> | 4.4 <sup>f</sup> |
| 2,3-Octanedione           | 5.4 <sup>c</sup> | 5.4 <sup>c</sup> | 5.1 <sup>e</sup> | 5.2 <sup>d</sup> | 5.2 <sup>d</sup> | 4.6 <sup>f</sup> | 5.6 <sup>b</sup> | 5.4 <sup>c</sup> | 5.7 <sup>a</sup> | 5.4 <sup>c</sup> |
| 3-Methyl-2-butanone       | 4.8 <sup>e</sup> | 4.8 <sup>e</sup> | 4.7 <sup>f</sup> | 4.6 <sup>g</sup> | 4.7 <sup>f</sup> | 4.4 <sup>h</sup> | 5.4 <sup>c</sup> | 4.9 <sup>d</sup> | 5.0 <sup>b</sup> | 5.6 <sup>a</sup> |
| 4-Methyl-2-pentanone      | 4.2 <sup>f</sup> | 4.4 <sup>c</sup> | 4.4 <sup>c</sup> | 4.4 <sup>c</sup> | 4.3 <sup>e</sup> | 4.3              | 4.7 <sup>b</sup> | 4.4 <sup>d</sup> | 4.5 <sup>c</sup> | 4.9 <sup>a</sup> |
| 2-Methyl-3-pentanone      | 5.7 <sup>b</sup> | 5.9 <sup>a</sup> | 5.4 <sup>d</sup> | 5.6 <sup>c</sup> | 5.6 <sup>c</sup> | 4.4 <sup>f</sup> | 4.3 <sup>g</sup> | 5.9 <sup>a</sup> | 5.9 <sup>a</sup> | 4.6 <sup>e</sup> |
| 3-Methyl-2-pentanone      | 4.9 <sup>f</sup> | 5.1 <sup>e</sup> | 4.7 <sup>g</sup> | 4.5 <sup>h</sup> | 4.9 <sup>f</sup> | 3.7 <sup>i</sup> | 5.8 <sup>b</sup> | 5.3 <sup>d</sup> | 5.6 <sup>c</sup> | 5.9 <sup>a</sup> |
| 3-Methyl-2-heptanone      | 5.7 <sup>d</sup> | 5.9 <sup>c</sup> | 5.4 <sup>f</sup> | 5.5 <sup>e</sup> | 5.7 <sup>d</sup> | 4.4 <sup>h</sup> | 4.8 <sup>g</sup> | 6.4 <sup>b</sup> | 6.6 <sup>a</sup> | 4.8 <sup>g</sup> |
| 6-Methyl-3-heptanone      | 4.1 <sup>g</sup> | 4.5 <sup>c</sup> | 4.3 <sup>e</sup> | 4.3 <sup>e</sup> | 4.2 <sup>f</sup> | 4.2 <sup>f</sup> | 5.9 <sup>b</sup> | 4.2 <sup>f</sup> | 4.4 <sup>d</sup> | 6.2 <sup>a</sup> |
| 6-Methyl-2-heptanone      | 4.8 <sup>d</sup> | 5.1 <sup>b</sup> | 4.9 <sup>c</sup> | 4.9 <sup>c</sup> | 4.7 <sup>e</sup> | 4.7 <sup>e</sup> | 4.2 <sup>f</sup> | 4.9 <sup>c</sup> | 5.3 <sup>a</sup> | 3.8 <sup>g</sup> |
| 5-Methyl-2-heptanone      | 4.8 <sup>e</sup> | 4.9 <sup>d</sup> | 4.6 <sup>f</sup> | 4.6 <sup>f</sup> | 4.6 <sup>f</sup> | 3.9 <sup>g</sup> | 5.1 <sup>c</sup> | 5.2 <sup>b</sup> | 5.6 <sup>a</sup> | 4.9 <sup>d</sup> |
| Cyclopentanone            | 4.8 <sup>d</sup> | 5.2 <sup>a</sup> | 5.0 <sup>b</sup> | 4.8 <sup>d</sup> | 4.7 <sup>e</sup> | 4.6 <sup>f</sup> | 4.8 <sup>d</sup> | 4.7 <sup>e</sup> | 4.9 <sup>c</sup> | 5.2 <sup>a</sup> |
| <i>Ketones</i>            |                  |                  |                  |                  |                  |                  |                  |                  |                  |                  |
| 1-Phenyl-ethanone         | 5.8 <sup>c</sup> | 6.0 <sup>b</sup> | 5.7 <sup>d</sup> | 5.7 <sup>d</sup> | 5.7 <sup>d</sup> | 5.6 <sup>e</sup> | 5.1 <sup>f</sup> | 5.8 <sup>c</sup> | 6.1 <sup>a</sup> | 5.1 <sup>f</sup> |
| <i>Esters</i>             |                  |                  |                  |                  |                  |                  |                  |                  |                  |                  |
| Methyl acetate            | 5.0 <sup>c</sup> | 5.0 <sup>c</sup> | 5.0 <sup>c</sup> | 5.0 <sup>c</sup> | 4.8 <sup>d</sup> | 4.7 <sup>e</sup> | 5.3 <sup>a</sup> | 5.0 <sup>c</sup> | 5.1 <sup>b</sup> | 4.8 <sup>d</sup> |
| Methyl butanoate          | 6.1 <sup>c</sup> | 6.2 <sup>b</sup> | 6.1 <sup>c</sup> | 6.0 <sup>d</sup> | 6.2 <sup>b</sup> | 6.3 <sup>a</sup> | 6.2 <sup>b</sup> | 6.1 <sup>c</sup> | 6.3 <sup>a</sup> | 5.9 <sup>e</sup> |
| Methyl 3-methyl-butanoate | 4.7 <sup>b</sup> | 4.4 <sup>c</sup> | 4.2 <sup>d</sup> | 3.9 <sup>f</sup> | 3.7 <sup>g</sup> | 3.1 <sup>h</sup> | 4.4 <sup>c</sup> | 4.7 <sup>b</sup> | 4.8 <sup>a</sup> | 4.1 <sup>e</sup> |
| Methyl 2-methyl-butanoate | 4.2 <sup>c</sup> | 4.3 <sup>b</sup> | 4.0 <sup>d</sup> | 3.7 <sup>f</sup> | 3.0 <sup>h</sup> | 3.3 <sup>g</sup> | 4.4 <sup>a</sup> | 3.3 <sup>g</sup> | 3.9 <sup>e</sup> | 3.7 <sup>f</sup> |
| Methyl pentanoate         | 4.6 <sup>d</sup> | 4.5 <sup>e</sup> | 4.6 <sup>d</sup> | 4.6 <sup>d</sup> | 4.7 <sup>c</sup> | 4.9 <sup>b</sup> | 4.6 <sup>d</sup> | 4.6 <sup>d</sup> | 5.1 <sup>a</sup> | 4.6 <sup>d</sup> |
| Methyl hexanoate          | 6.0 <sup>e</sup> | 6.2 <sup>c</sup> | 6.1 <sup>d</sup> | 5.9 <sup>f</sup> | 6.2 <sup>c</sup> | 6.5 <sup>a</sup> | 6.2 <sup>c</sup> | 6.0 <sup>e</sup> | 6.3 <sup>b</sup> | 5.8 <sup>g</sup> |
| Methyl octanoate          | 5.0 <sup>d</sup> | 5.2 <sup>b</sup> | 5.0 <sup>d</sup> | 4.9 <sup>e</sup> | 5.1 <sup>c</sup> | 5.4 <sup>a</sup> | 5.2 <sup>b</sup> | 5.1 <sup>c</sup> | 5.4 <sup>a</sup> | 5.0 <sup>d</sup> |
| Methyl benzoate           | 5.1 <sup>a</sup> | 5.1 <sup>a</sup> | 5.0 <sup>b</sup> | 5.0 <sup>b</sup> | 5.0 <sup>b</sup> | 5.0 <sup>b</sup> | 5.1 <sup>a</sup> | 4.9 <sup>c</sup> | 5.1 <sup>a</sup> | 5.0 <sup>b</sup> |
| Ethyl acetate             | 6.9 <sup>b</sup> | 7.1 <sup>a</sup> | 7.1 <sup>a</sup> | 6.9 <sup>b</sup> | 6.8 <sup>c</sup> | 6.9 <sup>b</sup> | 6.9 <sup>b</sup> | 6.7 <sup>d</sup> | 6.8 <sup>c</sup> | 6.7 <sup>d</sup> |
| Ethyl propanoate          | 5.7 <sup>b</sup> | 5.5 <sup>c</sup> | 5.4 <sup>d</sup> | 5.4 <sup>d</sup> | 5.5 <sup>c</sup> | 5.5 <sup>c</sup> | 5.7 <sup>b</sup> | 5.4 <sup>d</sup> | 5.8 <sup>a</sup> | 5.3 <sup>e</sup> |
| Ethyl 2-methyl-propionate | 5.1 <sup>b</sup> | 5.2 <sup>a</sup> | 4.9 <sup>e</sup> | 5.2 <sup>a</sup> | 5.0 <sup>d</sup> | 4.8 <sup>f</sup> | 5.2 <sup>a</sup> | 5.1 <sup>b</sup> | 5.1 <sup>b</sup> | 4.9 <sup>e</sup> |
| Ethyl butanoate           | 7.5 <sup>c</sup> | 7.6 <sup>b</sup> | 7.5 <sup>c</sup> | 7.5 <sup>c</sup> | 7.6 <sup>b</sup> | 7.7 <sup>a</sup> | 7.6 <sup>b</sup> | 7.6 <sup>b</sup> | 7.6 <sup>b</sup> | 7.2 <sup>d</sup> |
| Ethyl 2-butenate          | 5.2 <sup>b</sup> | 5.1 <sup>c</sup> | 4.6 <sup>f</sup> | 4.8 <sup>e</sup> | 5.2 <sup>b</sup> | 3.3 <sup>g</sup> | 5.2 <sup>b</sup> | 5.7 <sup>a</sup> | 5.7 <sup>a</sup> | 5.0 <sup>d</sup> |
| Ethyl 2-methyl-butanoate  | 4.8 <sup>b</sup> | 4.9 <sup>a</sup> | 4.7 <sup>c</sup> | 4.9 <sup>a</sup> | 4.8 <sup>b</sup> | 4.9 <sup>a</sup> | 4.9 <sup>a</sup> | 4.7 <sup>c</sup> | 4.7 <sup>c</sup> | 4.5 <sup>d</sup> |

|                                    |                         |                  |                  |                  |                  |                  |                  |                  |                  |                  |
|------------------------------------|-------------------------|------------------|------------------|------------------|------------------|------------------|------------------|------------------|------------------|------------------|
| Ethyl 3-methyl-butanoate           | 5.2 <sup>c</sup>        | 5.2 <sup>c</sup> | 4.9 <sup>e</sup> | 5.4 <sup>b</sup> | 4.9 <sup>e</sup> | 4.9 <sup>e</sup> | 5.5 <sup>a</sup> | 5.4 <sup>b</sup> | 5.5 <sup>a</sup> | 5.0 <sup>d</sup> |
| Ethyl pentanoate                   | 5.3 <sup>g</sup>        | 5.5 <sup>e</sup> | 5.4 <sup>f</sup> | 7.4 <sup>b</sup> | 5.4 <sup>f</sup> | 5.8 <sup>d</sup> | 7.5 <sup>a</sup> | 5.4 <sup>f</sup> | 5.5 <sup>e</sup> | 7.0 <sup>c</sup> |
| Ethyl hexanoate                    | 7.4 <sup>d</sup>        | 7.5 <sup>c</sup> | 7.5 <sup>c</sup> | 4.8 <sup>f</sup> | 7.5 <sup>c</sup> | 7.8 <sup>a</sup> | 5.0 <sup>e</sup> | 7.4 <sup>d</sup> | 7.6 <sup>b</sup> | 4.6 <sup>g</sup> |
| Ethyl heptanoate                   | 4.8 <sup>h</sup>        | 5.0 <sup>f</sup> | 4.9 <sup>g</sup> | 6.0 <sup>b</sup> | 5.0 <sup>f</sup> | 5.3 <sup>d</sup> | 6.1 <sup>a</sup> | 4.9 <sup>g</sup> | 5.1 <sup>e</sup> | 5.8 <sup>c</sup> |
| Ethyl octanoate                    | 5.9 <sup>e</sup>        | 6.1 <sup>c</sup> | 5.9 <sup>e</sup> | 5.5 <sup>f</sup> | 6.0 <sup>d</sup> | 6.3 <sup>a</sup> | 5.5 <sup>f</sup> | 6.1 <sup>c</sup> | 6.2 <sup>b</sup> | 6.1 <sup>c</sup> |
| Propyl acetate                     | 5.4 <sup>g</sup>        | 5.6 <sup>f</sup> | 5.7 <sup>e</sup> | 6.4 <sup>a</sup> | 5.4              | 5.9 <sup>c</sup> | 6.4 <sup>a</sup> | 5.7 <sup>e</sup> | 6.3 <sup>b</sup> | 5.8 <sup>d</sup> |
| Propyl butanoate                   | 6.2 <sup>e</sup>        | 6.3 <sup>d</sup> | 6.6 <sup>b</sup> | 5.6 <sup>h</sup> | 6.4 <sup>c</sup> | 7.0 <sup>a</sup> | 5.7 <sup>g</sup> | 6.0 <sup>f</sup> | 6.6 <sup>b</sup> | 5.0 <sup>i</sup> |
| Propyl hexanoate                   | 5.6 <sup>d</sup>        | 5.6 <sup>d</sup> | 5.9 <sup>b</sup> | 5.8 <sup>c</sup> | 5.8 <sup>c</sup> | 6.5 <sup>a</sup> | 5.8 <sup>c</sup> | 5.3 <sup>e</sup> | 5.8 <sup>c</sup> | 5.8 <sup>c</sup> |
| Butyl acetate                      | 5.8 <sup>e</sup>        | 5.7 <sup>f</sup> | 6.0 <sup>c</sup> | 6.0 <sup>c</sup> | 5.8 <sup>e</sup> | 6.6 <sup>a</sup> | 5.9 <sup>d</sup> | 5.6 <sup>g</sup> | 6.3 <sup>b</sup> | 5.4 <sup>h</sup> |
| Butyl butanoate                    | 5.8 <sup>e</sup>        | 5.9 <sup>d</sup> | 6.2 <sup>c</sup> | 4.8 <sup>h</sup> | 5.9 <sup>d</sup> | 6.7 <sup>a</sup> | 5.0 <sup>g</sup> | 5.6 <sup>f</sup> | 6.2 <sup>c</sup> | 6.3 <sup>b</sup> |
| Pentyl acetate                     | 5.3 <sup>c</sup>        | 5.1 <sup>d</sup> | 4.8 <sup>f</sup> | 5.0 <sup>e</sup> | 4.5 <sup>g</sup> | 4.2 <sup>h</sup> | 5.3 <sup>c</sup> | 6.1 <sup>b</sup> | 6.7 <sup>a</sup> | 5.0 <sup>e</sup> |
| 2-Pentyl butanoate                 | 4.9 <sup>g</sup>        | 5.4 <sup>c</sup> | 5.0 <sup>f</sup> | 4.5 <sup>i</sup> | 5.1 <sup>e</sup> | 5.2 <sup>d</sup> | 4.3 <sup>j</sup> | 5.7 <sup>a</sup> | 5.6 <sup>b</sup> | 4.6 <sup>h</sup> |
| Hexyl acetate                      | 4.3 <sup>g</sup>        | 4.3 <sup>g</sup> | 5.2 <sup>c</sup> | 5.3 <sup>b</sup> | 4.0 <sup>i</sup> | 4.6 <sup>f</sup> | 5.4 <sup>a</sup> | 4.4 <sup>h</sup> | 5.0 <sup>d</sup> | 4.9 <sup>e</sup> |
| 3-Methyl-butyl acetate             | 5.5 <sup>d</sup>        | 5.8 <sup>b</sup> | 5.9 <sup>a</sup> | 4.9 <sup>f</sup> | 5.4 <sup>e</sup> | 5.7 <sup>c</sup> | 4.6 <sup>g</sup> | 5.4 <sup>e</sup> | 5.5 <sup>d</sup> | 4.5 <sup>h</sup> |
| 2-Methyl-butyl acetate             | 4.6 <sup>d</sup>        | 5.2 <sup>c</sup> | 5.3 <sup>b</sup> | 5.7 <sup>a</sup> | 4.4 <sup>f</sup> | 4.4 <sup>f</sup> | 5.7 <sup>a</sup> | 4.5 <sup>e</sup> | 4.4 <sup>f</sup> | 5.3 <sup>b</sup> |
| 1-Methyl-propyl butanoate          | 6.1 <sup>e</sup>        | 6.0 <sup>f</sup> | 6.6 <sup>c</sup> | 4.9 <sup>h</sup> | 6.4 <sup>d</sup> | 7.1 <sup>a</sup> | 4.9 <sup>h</sup> | 5.8 <sup>g</sup> | 6.7 <sup>b</sup> | 4.5 <sup>i</sup> |
| 2-Methyl-propyl butanoate          | 5.3 <sup>f</sup>        | 5.6 <sup>c</sup> | 5.5 <sup>d</sup> | 6.1 <sup>b</sup> | 5.4 <sup>e</sup> | 5.5 <sup>d</sup> | 6.3 <sup>a</sup> | 5.3 <sup>f</sup> | 5.6 <sup>c</sup> | 5.3 <sup>f</sup> |
| Isopropyl butanoate                | 5.2 <sup>g</sup>        | 5.4 <sup>e</sup> | 5.4 <sup>e</sup> | 5.5 <sup>d</sup> | 5.3 <sup>f</sup> | 5.7 <sup>b</sup> | 5.6 <sup>c</sup> | 5.8 <sup>a</sup> | 5.8 <sup>a</sup> | 5.1 <sup>h</sup> |
| 2-Methyl-propyl acetate            | 4.5 <sup>f</sup>        | 5.0 <sup>e</sup> | 5.2 <sup>d</sup> | 5.8 <sup>b</sup> | 4.1 <sup>i</sup> | 3.5 <sup>j</sup> | 5.9 <sup>a</sup> | 4.3 <sup>g</sup> | 4.2 <sup>h</sup> | 5.3 <sup>c</sup> |
| 3-Methyl-butyl butanoate           | 5.7 <sup>c</sup>        | 5.9 <sup>b</sup> | 5.9 <sup>b</sup> | 5.3 <sup>e</sup> | 5.7 <sup>c</sup> | 6.0 <sup>a</sup> | 5.3 <sup>e</sup> | 5.6 <sup>d</sup> | 5.9 <sup>b</sup> | 4.9 <sup>b</sup> |
| 2-Methyl-butyl butanoate           | 5.2 <sup>e</sup>        | 5.6 <sup>a</sup> | 5.4 <sup>c</sup> | 5.3 <sup>d</sup> | 5.1 <sup>f</sup> | 5.5 <sup>b</sup> | 5.3 <sup>d</sup> | 5.3 <sup>d</sup> | 5.4 <sup>c</sup> | 4.9 <sup>g</sup> |
| <i>Sulfur compounds</i>            |                         |                  |                  |                  |                  |                  |                  |                  |                  |                  |
| Methanethiol                       | 4.8 <sup>f</sup>        | 5.4 <sup>c</sup> | 5.7 <sup>b</sup> | 5.2 <sup>d</sup> | 4.6 <sup>h</sup> | 4.8 <sup>f</sup> | 5.9 <sup>a</sup> | 4.3 <sup>i</sup> | 5.1 <sup>e</sup> | 4.7 <sup>g</sup> |
| Dimethyl-sulfide                   | 4.5 <sup>b</sup>        | 4.4 <sup>c</sup> | 4.6 <sup>a</sup> | 4.1 <sup>f</sup> | 4.4 <sup>c</sup> | 4.5 <sup>b</sup> | 4.6 <sup>a</sup> | 4.3 <sup>d</sup> | 4.4 <sup>c</sup> | 4.2 <sup>e</sup> |
| Dimethyl-disulfide                 | 6.8 <sup>f</sup>        | 7.0 <sup>d</sup> | 7.4 <sup>a</sup> | 7.3 <sup>b</sup> | 6.6 <sup>h</sup> | 6.1 <sup>h</sup> | 7.3 <sup>b</sup> | 6.7 <sup>g</sup> | 6.9 <sup>e</sup> | 7.1 <sup>c</sup> |
| Dimethyl-trisulfide                | 5.0 <sup>f</sup>        | 5.7 <sup>b</sup> | 5.7 <sup>b</sup> | 6.1 <sup>a</sup> | 4.9 <sup>g</sup> | 4.9 <sup>g</sup> | 5.6 <sup>c</sup> | 4.9 <sup>g</sup> | 5.1 <sup>e</sup> | 5.2 <sup>d</sup> |
| 2,4-Dithiapentane                  | 5.0 <sup>c</sup>        | 5.0 <sup>c</sup> | 5.0 <sup>c</sup> | 5.1 <sup>b</sup> | 5.0 <sup>c</sup> | 5.3 <sup>a</sup> | 5.1 <sup>b</sup> | 4.9 <sup>d</sup> | 5.1 <sup>b</sup> | 4.9 <sup>d</sup> |
| Methional                          | 5.0 <sup>b</sup>        | 4.4 <sup>f</sup> | 5.0 <sup>b</sup> | 4.7 <sup>d</sup> | 4.9 <sup>c</sup> | 5.2 <sup>a</sup> | 4.6 <sup>e</sup> | 4.7 <sup>d</sup> | 4.6 <sup>e</sup> | 4.4 <sup>f</sup> |
| S-methyl thioacetate               | 4.8 <sup>e</sup>        | 5.5 <sup>c</sup> | 5.6 <sup>b</sup> | 5.5 <sup>c</sup> | 5.0 <sup>d</sup> | 5.0 <sup>d</sup> | 6.1 <sup>a</sup> | 4.2 <sup>g</sup> | 5.0 <sup>d</sup> | 4.6 <sup>f</sup> |
| Thiophene                          | 5.2 <sup>e</sup>        | 5.4 <sup>d</sup> | 5.7 <sup>b</sup> | 6.6 <sup>a</sup> | 5.0 <sup>g</sup> | 5.5 <sup>c</sup> | 5.2 <sup>e</sup> | 4.8 <sup>h</sup> | 5.1 <sup>f</sup> | 5.0 <sup>g</sup> |
| 2-Methyl-tetrahydro-thiophen-3-one | 4.6 <sup>f</sup>        | 5.0 <sup>b</sup> | 4.9 <sup>c</sup> | 4.8 <sup>d</sup> | 4.3 <sup>h</sup> | 4.5 <sup>g</sup> | 5.2 <sup>a</sup> | 4.6 <sup>f</sup> | 4.8 <sup>d</sup> | 4.7 <sup>e</sup> |
| Methyl isothiocyanate              | 5.0 <sup>b</sup>        | 5.0 <sup>b</sup> | 5.1 <sup>a</sup> | 4.9 <sup>c</sup> | 4.9 <sup>c</sup> | 5.1 <sup>a</sup> | 5.0 <sup>b</sup> | 4.7 <sup>e</sup> | 5.0 <sup>b</sup> | 4.8 <sup>d</sup> |
| <i>Furans</i>                      |                         |                  |                  |                  |                  |                  |                  |                  |                  |                  |
| 2-Methyl-furan                     | 5.0 <sup>c</sup>        | 5.2 <sup>a</sup> | 5.0 <sup>c</sup> | 5.1 <sup>b</sup> | 5.0 <sup>c</sup> | 5.2 <sup>a</sup> | 5.2 <sup>a</sup> | 5.0 <sup>c</sup> | 5.2 <sup>a</sup> | 5.0 <sup>c</sup> |
| 2-Ethyl-furan                      | 5.5 <sup>e</sup>        | 5.8 <sup>b</sup> | 5.8 <sup>b</sup> | 5.6 <sup>d</sup> | 5.4 <sup>f</sup> | 5.5 <sup>e</sup> | 6.1 <sup>a</sup> | 5.5 <sup>e</sup> | 5.7 <sup>c</sup> | 5.6 <sup>d</sup> |
| 2-Propyl-furan                     | 4.5 <sup>d</sup>        | 4.8 <sup>c</sup> | 4.9 <sup>b</sup> | 4.6 <sup>c</sup> | 4.4 <sup>e</sup> | 4.4 <sup>e</sup> | 5.1 <sup>a</sup> | 4.4 <sup>e</sup> | 4.6 <sup>c</sup> | 4.5 <sup>d</sup> |
| 3-Methyl-furan                     | 4.6 <sup>d</sup>        | 4.9 <sup>a</sup> | 4.7 <sup>c</sup> | 4.7 <sup>c</sup> | 4.5 <sup>e</sup> | 4.7 <sup>c</sup> | 4.9 <sup>a</sup> | 4.5 <sup>e</sup> | 4.8 <sup>b</sup> | 4.6 <sup>d</sup> |
| 2,4-Dimethyl-furan                 | 4.8 <sup>b</sup>        | 4.9 <sup>a</sup> | 4.7 <sup>c</sup> | 4.9 <sup>a</sup> | 4.7 <sup>c</sup> | 4.7 <sup>c</sup> | 4.4 <sup>e</sup> | 4.7 <sup>c</sup> | 4.8 <sup>b</sup> | 4.5 <sup>d</sup> |
| 2,5-Dimethyl-furan                 | 4.8 <sup>b</sup>        | 4.7 <sup>c</sup> | 4.6 <sup>d</sup> | 4.4 <sup>f</sup> | 4.4 <sup>f</sup> | 4.7 <sup>c</sup> | 4.6 <sup>d</sup> | 4.5 <sup>e</sup> | 4.9 <sup>a</sup> | 4.7 <sup>c</sup> |
| Furfural                           | 4.8 <sup>c</sup>        | 5.0 <sup>b</sup> | 5.0 <sup>b</sup> | 4.8 <sup>c</sup> | 4.6 <sup>e</sup> | 4.7 <sup>d</sup> | 5.1 <sup>a</sup> | 4.6 <sup>e</sup> | 4.8 <sup>c</sup> | 4.6 <sup>e</sup> |
|                                    | <b>Pecorino Toscano</b> |                  |                  |                  |                  |                  |                  |                  |                  |                  |
| Acetaldehyde                       | 5.9 <sup>b</sup>        | 5.9 <sup>b</sup> | 5.9 <sup>b</sup> | 5.9 <sup>b</sup> | 6.0 <sup>a</sup> | 6.0 <sup>a</sup> | 6.0 <sup>a</sup> | 5.9 <sup>b</sup> | 5.8 <sup>c</sup> | 6.0 <sup>a</sup> |
| Butanal                            | 5.4 <sup>c</sup>        | 5.4 <sup>c</sup> | 5.7 <sup>b</sup> | 5.7 <sup>b</sup> | 5.8 <sup>a</sup> | 5.7 <sup>b</sup> | 5.7 <sup>b</sup> | 5.7 <sup>b</sup> | 5.4 <sup>c</sup> | 5.8 <sup>a</sup> |
| Pentanal                           | 6.2 <sup>e</sup>        | 6.5 <sup>d</sup> | 7.0 <sup>b</sup> | 7.0 <sup>b</sup> | 7.1 <sup>a</sup> | 6.8 <sup>c</sup> | 6.8 <sup>c</sup> | 6.8 <sup>c</sup> | 6.5 <sup>d</sup> | 7.1 <sup>a</sup> |
| Hexanal                            | 5.7 <sup>d</sup>        | 5.7 <sup>d</sup> | 5.9 <sup>c</sup> | 5.9 <sup>c</sup> | 6.1 <sup>a</sup> | 6.0 <sup>b</sup> | 6.0 <sup>b</sup> | 5.9 <sup>c</sup> | 5.6 <sup>e</sup> | 6.1 <sup>a</sup> |
| Heptanal                           | 4.4 <sup>e</sup>        | 5.5 <sup>c</sup> | 5.5 <sup>c</sup> | 5.5 <sup>c</sup> | 5.7 <sup>a</sup> | 5.6 <sup>b</sup> | 5.6 <sup>b</sup> | 5.6 <sup>b</sup> | 5.3 <sup>d</sup> | 5.7 <sup>a</sup> |
| Octanal                            | 5.4 <sup>c</sup>        | 5.4 <sup>c</sup> | 5.3 <sup>d</sup> | 5.3 <sup>d</sup> | 5.5 <sup>b</sup> | 5.6 <sup>a</sup> | 5.6 <sup>a</sup> | 5.4 <sup>c</sup> | 5.2 <sup>e</sup> | 5.5 <sup>b</sup> |

|                       |                  |                  |                  |                  |                  |                  |                  |                  |                  |                   |
|-----------------------|------------------|------------------|------------------|------------------|------------------|------------------|------------------|------------------|------------------|-------------------|
| Nonanal               | 5.9 <sup>c</sup> | 5.8 <sup>d</sup> | 5.8 <sup>d</sup> | 5.8 <sup>d</sup> | 5.9 <sup>c</sup> | 6.2 <sup>a</sup> | 6.2 <sup>a</sup> | 6.0 <sup>b</sup> | 5.9 <sup>c</sup> | 5.9 <sup>c</sup>  |
| Decanal               | 4.4 <sup>c</sup> | 4.1 <sup>e</sup> | 4.3 <sup>d</sup> | 4.3 <sup>d</sup> | 4.6 <sup>b</sup> | 4.9 <sup>a</sup> | 4.9 <sup>a</sup> | 4.4 <sup>c</sup> | 4.3 <sup>d</sup> | 4.6 <sup>b</sup>  |
| Propenal              | 5.2 <sup>d</sup> | 5.1 <sup>e</sup> | 5.3 <sup>c</sup> | 5.3 <sup>c</sup> | 5.4 <sup>b</sup> | 5.5 <sup>a</sup> | 5.5 <sup>a</sup> | 5.1 <sup>e</sup> | 4.9 <sup>f</sup> | 5.4 <sup>b</sup>  |
| 2-Pentenal            | 4.7 <sup>f</sup> | 4.8 <sup>e</sup> | 5.1 <sup>c</sup> | 5.1 <sup>c</sup> | 5.3 <sup>a</sup> | 5.2 <sup>b</sup> | 5.2 <sup>b</sup> | 5.0 <sup>d</sup> | 4.6 <sup>g</sup> | 5.3 <sup>a</sup>  |
| 2-Hexenal             | 4.7 <sup>e</sup> | 4.6 <sup>f</sup> | 5.0 <sup>c</sup> | 5.0 <sup>c</sup> | 5.2 <sup>a</sup> | 5.1 <sup>b</sup> | 5.1 <sup>b</sup> | 4.8 <sup>d</sup> | 4.6 <sup>f</sup> | 5.2 <sup>a</sup>  |
| 2,4-Hexadienal        | 4.4 <sup>c</sup> | 4.3 <sup>d</sup> | 4.7 <sup>a</sup> | 4.7 <sup>a</sup> | 4.7 <sup>a</sup> | 4.6 <sup>b</sup> | 4.6 <sup>b</sup> | 4.3 <sup>d</sup> | 4.0 <sup>e</sup> | 4.7 <sup>a</sup>  |
| 2-Heptenal            | 4.8 <sup>e</sup> | 4.8 <sup>e</sup> | 5.4 <sup>b</sup> | 5.4 <sup>b</sup> | 5.6 <sup>a</sup> | 5.3 <sup>c</sup> | 5.3 <sup>c</sup> | 5.1 <sup>d</sup> | 4.7 <sup>f</sup> | 5.6 <sup>a</sup>  |
| 2-Octenal             | 4.7 <sup>d</sup> | 4.4 <sup>g</sup> | 4.8 <sup>c</sup> | 4.8 <sup>c</sup> | 4.9 <sup>b</sup> | 5.1 <sup>a</sup> | 5.1 <sup>a</sup> | 4.6 <sup>e</sup> | 4.5 <sup>f</sup> | 4.9 <sup>b</sup>  |
| 2-Methyl-propanal     | 6.1 <sup>c</sup> | 6.4 <sup>a</sup> | 6.4 <sup>a</sup> | 6.4 <sup>a</sup> | 6.3 <sup>b</sup> | 6.4 <sup>a</sup> | 6.4 <sup>a</sup> | 6.4 <sup>a</sup> | 6.0 <sup>d</sup> | 6.3 <sup>ab</sup> |
| 3-Methyl-butanal      | 6.6 <sup>e</sup> | 7.1 <sup>b</sup> | 7.1 <sup>b</sup> | 7.1 <sup>b</sup> | 6.9 <sup>c</sup> | 6.8 <sup>d</sup> | 6.8 <sup>d</sup> | 7.2 <sup>a</sup> | 6.9 <sup>c</sup> | 6.9 <sup>c</sup>  |
| 2-Methyl-butanal      | 6.1 <sup>e</sup> | 6.6 <sup>a</sup> | 6.5 <sup>b</sup> | 6.5 <sup>b</sup> | 6.4 <sup>c</sup> | 6.3 <sup>d</sup> | 6.3 <sup>d</sup> | 6.6 <sup>a</sup> | 6.3 <sup>d</sup> | 6.4 <sup>c</sup>  |
| Benzaldehyde          | 6.2 <sup>c</sup> | 6.2 <sup>e</sup> | 6.4 <sup>d</sup> | 6.4 <sup>d</sup> | 6.6 <sup>b</sup> | 6.7 <sup>a</sup> | 6.7 <sup>a</sup> | 6.5 <sup>c</sup> | 6.0 <sup>f</sup> | 6.6 <sup>b</sup>  |
| Benzeneacetaldehyde   | 5.6 <sup>f</sup> | 5.9 <sup>d</sup> | 6.2 <sup>a</sup> | 6.2 <sup>a</sup> | 6.2 <sup>a</sup> | 6.1 <sup>b</sup> | 6.1 <sup>b</sup> | 6.0 <sup>c</sup> | 5.8 <sup>e</sup> | 6.2 <sup>a</sup>  |
| <i>Alcohols</i>       |                  |                  |                  |                  |                  |                  |                  |                  |                  |                   |
| Methanol              | 5.0 <sup>c</sup> | 5.1 <sup>b</sup> | 5.2 <sup>a</sup> | 5.2 <sup>a</sup> | 5.1 <sup>b</sup> | 5.2 <sup>a</sup> | 5.2 <sup>a</sup> | 5.1 <sup>b</sup> | 5.1 <sup>b</sup> | 5.1 <sup>b</sup>  |
| Ethanol               | 6.6 <sup>e</sup> | 6.9 <sup>c</sup> | 7.0 <sup>b</sup> | 7.0 <sup>b</sup> | 7.3 <sup>a</sup> | 6.9 <sup>c</sup> | 6.9 <sup>c</sup> | 6.7 <sup>d</sup> | 6.6 <sup>c</sup> | 7.3 <sup>a</sup>  |
| 1-Propanol            | 5.1 <sup>d</sup> | 5.4 <sup>a</sup> | 5.1 <sup>d</sup> | 5.1 <sup>d</sup> | 5.3 <sup>b</sup> | 5.2 <sup>c</sup> | 5.2 <sup>c</sup> | 4.9 <sup>e</sup> | 4.9 <sup>e</sup> | 5.3 <sup>b</sup>  |
| 1-Butanol             | 5.9 <sup>d</sup> | 6.1 <sup>b</sup> | 6.2 <sup>a</sup> | 6.2 <sup>a</sup> | 6.0 <sup>c</sup> | 5.9 <sup>d</sup> | 5.9 <sup>d</sup> | 6.0 <sup>c</sup> | 5.8 <sup>e</sup> | 6.0 <sup>c</sup>  |
| 1-Pentanol            | 6.3 <sup>e</sup> | 6.5 <sup>d</sup> | 7.0 <sup>a</sup> | 7.0 <sup>a</sup> | 7.0 <sup>a</sup> | 6.8 <sup>b</sup> | 6.8 <sup>b</sup> | 6.8 <sup>b</sup> | 6.6 <sup>c</sup> | 7.0 <sup>a</sup>  |
| <i>Alcohols</i>       |                  |                  |                  |                  |                  |                  |                  |                  |                  |                   |
| 1-Hexanol             | 5.6 <sup>d</sup> | 5.7 <sup>c</sup> | 5.8 <sup>b</sup> | 5.8 <sup>b</sup> | 5.8 <sup>b</sup> | 5.9 <sup>a</sup> | 5.9 <sup>a</sup> | 5.7 <sup>c</sup> | 5.6 <sup>d</sup> | 5.8 <sup>b</sup>  |
| 1-Heptanol            | 5.3 <sup>c</sup> | 5.2 <sup>d</sup> | 5.4 <sup>b</sup> | 5.4 <sup>b</sup> | 5.3 <sup>c</sup> | 5.5 <sup>a</sup> | 5.5 <sup>a</sup> | 5.2 <sup>d</sup> | 5.1 <sup>e</sup> | 5.3 <sup>c</sup>  |
| 1-Octen-3-ol          | 5.0 <sup>a</sup> | 5.0 <sup>a</sup> | 5.0 <sup>a</sup> | 5.0 <sup>a</sup> | 4.9 <sup>b</sup> | 4.4 <sup>d</sup> | 4.4 <sup>d</sup> | 5.0 <sup>a</sup> | 4.7 <sup>c</sup> | 4.9 <sup>b</sup>  |
| 2-Propanol            | 6.7 <sup>d</sup> | 7.1 <sup>a</sup> | 6.9 <sup>c</sup> | 6.9 <sup>c</sup> | 7.0 <sup>b</sup> | 6.9 <sup>c</sup> | 6.9 <sup>c</sup> | 6.6 <sup>e</sup> | 6.5 <sup>f</sup> | 7.0 <sup>b</sup>  |
| 2-Butanol             | 5.3 <sup>c</sup> | 5.6 <sup>a</sup> | 5.4 <sup>b</sup> | 5.4 <sup>b</sup> | 5.4 <sup>b</sup> | 5.6 <sup>a</sup> | 5.6 <sup>a</sup> | 5.3 <sup>c</sup> | 5.3 <sup>c</sup> | 5.4 <sup>b</sup>  |
| 2-Pentanol            | 6.4 <sup>b</sup> | 6.8 <sup>a</sup> | 6.4 <sup>b</sup> | 6.4 <sup>b</sup> | 6.4 <sup>b</sup> | 6.1 <sup>d</sup> | 6.1 <sup>d</sup> | 6.3 <sup>c</sup> | 5.9 <sup>e</sup> | 6.4 <sup>b</sup>  |
| 2-Heptanol            | 7.3 <sup>d</sup> | 7.8 <sup>a</sup> | 7.7 <sup>b</sup> | 7.7 <sup>b</sup> | 7.2 <sup>e</sup> | 6.6 <sup>g</sup> | 6.6 <sup>g</sup> | 7.4 <sup>c</sup> | 7.1 <sup>f</sup> | 7.2 <sup>e</sup>  |
| 2-Methyl-1-propanol   | 5.4 <sup>b</sup> | 5.4 <sup>b</sup> | 5.5 <sup>a</sup> | 5.5 <sup>a</sup> | 5.3 <sup>c</sup> | 5.4 <sup>b</sup> | 5.4 <sup>b</sup> | 5.2 <sup>d</sup> | 5.2 <sup>d</sup> | 5.3 <sup>c</sup>  |
| 3-Methyl-3-buten-1-ol | 5.0 <sup>c</sup> | 5.1 <sup>b</sup> | 5.1 <sup>b</sup> | 5.1 <sup>b</sup> | 5.0 <sup>c</sup> | 5.2 <sup>a</sup> | 5.2 <sup>a</sup> | 4.8 <sup>e</sup> | 4.9 <sup>d</sup> | 5.0 <sup>c</sup>  |
| 3-Methyl-1-butanol    | 6.6 <sup>c</sup> | 6.9 <sup>a</sup> | 6.9 <sup>a</sup> | 6.9 <sup>a</sup> | 6.8 <sup>b</sup> | 6.8 <sup>b</sup> | 6.8 <sup>b</sup> | 6.6 <sup>c</sup> | 6.6 <sup>c</sup> | 6.8 <sup>b</sup>  |
| 2-Methyl-1-butanol    | 5.8 <sup>c</sup> | 6.0 <sup>a</sup> | 5.9 <sup>b</sup> | 5.9 <sup>b</sup> | 5.8 <sup>c</sup> | 5.8 <sup>c</sup> | 5.8 <sup>c</sup> | 5.7 <sup>d</sup> | 5.6 <sup>e</sup> | 5.8 <sup>c</sup>  |
| 2-Methyl-2-propanol   | 5.7 <sup>a</sup> | 5.5 <sup>c</sup> | 5.4 <sup>d</sup> | 5.4 <sup>d</sup> | 5.5 <sup>c</sup> | 5.6 <sup>b</sup> | 5.6 <sup>b</sup> | 5.4 <sup>d</sup> | 5.3 <sup>e</sup> | 5.5 <sup>c</sup>  |
| 3-Methyl-2-butanol    | 5.3 <sup>b</sup> | 5.5 <sup>a</sup> | 5.3 <sup>b</sup> | 5.3 <sup>b</sup> | 5.3 <sup>b</sup> | 5.1 <sup>d</sup> | 5.1 <sup>d</sup> | 5.2 <sup>c</sup> | 5.1 <sup>d</sup> | 5.3 <sup>b</sup>  |
| 3-Methyl-2-pentanol   | 4.9 <sup>c</sup> | 5.1 <sup>a</sup> | 5.0 <sup>b</sup> | 5.0 <sup>b</sup> | 4.7 <sup>e</sup> | 4.7 <sup>e</sup> | 4.7 <sup>e</sup> | 4.8 <sup>d</sup> | 4.7 <sup>e</sup> | 4.7 <sup>e</sup>  |
| 4-Methyl-2-pentanol   | 5.0 <sup>d</sup> | 5.3 <sup>a</sup> | 5.2 <sup>b</sup> | 5.2 <sup>b</sup> | 5.0 <sup>d</sup> | 5.2 <sup>b</sup> | 5.2 <sup>b</sup> | 5.1 <sup>c</sup> | 5.0 <sup>d</sup> | 5.0 <sup>d</sup>  |
| <i>Ketones</i>        |                  |                  |                  |                  |                  |                  |                  |                  |                  |                   |
| 2-Propanone           | 7.3 <sup>a</sup> | 7.3 <sup>a</sup> | 7.2 <sup>b</sup> | 7.2 <sup>b</sup> | 7.2 <sup>b</sup> | 7.1 <sup>c</sup> | 7.1 <sup>c</sup> | 7.1 <sup>c</sup> | 6.9 <sup>d</sup> | 7.2 <sup>b</sup>  |
| 2-Butanone            | 7.0 <sup>a</sup> | 7.0 <sup>a</sup> | 6.9 <sup>b</sup> | 6.9 <sup>b</sup> | 6.9 <sup>b</sup> | 6.9 <sup>b</sup> | 6.9 <sup>b</sup> | 7.0 <sup>a</sup> | 6.8 <sup>c</sup> | 6.9 <sup>b</sup>  |
| 2-Pentanone           | 8.6 <sup>c</sup> | 8.8 <sup>a</sup> | 8.7 <sup>b</sup> | 8.7 <sup>b</sup> | 8.5 <sup>d</sup> | 8.3 <sup>f</sup> | 8.3 <sup>f</sup> | 8.4 <sup>e</sup> | 8.2 <sup>g</sup> | 8.5 <sup>d</sup>  |
| 3-Hexanone            | 5.8 <sup>a</sup> | 5.8 <sup>a</sup> | 5.6 <sup>c</sup> | 5.6 <sup>c</sup> | 5.6 <sup>c</sup> | 5.4 <sup>e</sup> | 5.4 <sup>e</sup> | 5.7 <sup>b</sup> | 5.5 <sup>d</sup> | 5.6 <sup>c</sup>  |
| 2-Hexanone            | 6.8 <sup>c</sup> | 7.2 <sup>a</sup> | 7.0 <sup>b</sup> | 7.0 <sup>b</sup> | 6.7 <sup>d</sup> | 6.5 <sup>e</sup> | 6.5 <sup>e</sup> | 6.7 <sup>d</sup> | 6.4 <sup>f</sup> | 6.7 <sup>d</sup>  |
| 4-Heptanone           | 5.9 <sup>b</sup> | 6.0 <sup>a</sup> | 5.8 <sup>c</sup> | 5.8 <sup>c</sup> | 5.7 <sup>d</sup> | 5.3 <sup>f</sup> | 5.3 <sup>f</sup> | 6.0 <sup>a</sup> | 5.6 <sup>e</sup> | 5.7 <sup>d</sup>  |
| 3-Heptanone           | 4.4 <sup>c</sup> | 4.5 <sup>b</sup> | 4.6 <sup>a</sup> | 4.6 <sup>a</sup> | 4.5 <sup>b</sup> | 4.4 <sup>c</sup> | 4.4 <sup>c</sup> | 4.5 <sup>b</sup> | 4.4 <sup>c</sup> | 4.5 <sup>b</sup>  |
| 2-Heptanone           | 8.2 <sup>c</sup> | 8.5 <sup>a</sup> | 8.5 <sup>a</sup> | 8.5 <sup>a</sup> | 8.1 <sup>d</sup> | 7.7 <sup>f</sup> | 7.7 <sup>f</sup> | 8.3 <sup>b</sup> | 8.0 <sup>e</sup> | 8.1 <sup>d</sup>  |
| 3-Octanone            | 5.3 <sup>b</sup> | 5.3 <sup>b</sup> | 5.3 <sup>b</sup> | 5.3 <sup>b</sup> | 5.1 <sup>c</sup> | 5.1 <sup>c</sup> | 5.1 <sup>c</sup> | 5.4 <sup>a</sup> | 5.1 <sup>c</sup> | 5.1 <sup>c</sup>  |
| 2-Octanone            | 6.3 <sup>d</sup> | 6.7 <sup>b</sup> | 6.8 <sup>a</sup> | 6.8 <sup>a</sup> | 6.2 <sup>e</sup> | 6.0 <sup>f</sup> | 6.0 <sup>f</sup> | 6.5 <sup>c</sup> | 6.2 <sup>e</sup> | 6.2 <sup>e</sup>  |
| 4-Nonanone            | 4.9 <sup>a</sup> | 4.6 <sup>c</sup> | 4.6 <sup>c</sup> | 4.6 <sup>c</sup> | 4.5 <sup>d</sup> | 4.6 <sup>c</sup> | 4.6 <sup>c</sup> | 4.8 <sup>b</sup> | 4.4 <sup>e</sup> | 4.5 <sup>d</sup>  |
| 2-Nonanone            | 7.1 <sup>d</sup> | 7.5 <sup>b</sup> | 7.6 <sup>a</sup> | 7.6 <sup>a</sup> | 7.3 <sup>c</sup> | 7.0 <sup>e</sup> | 7.0 <sup>e</sup> | 7.5 <sup>b</sup> | 7.1 <sup>d</sup> | 7.3 <sup>c</sup>  |

|                           |                  |                  |                  |                  |                  |                  |                  |                  |                  |                  |
|---------------------------|------------------|------------------|------------------|------------------|------------------|------------------|------------------|------------------|------------------|------------------|
| 3-Buten-2-one             | 5.7 <sup>a</sup> | 5.6 <sup>b</sup> | 5.6 <sup>b</sup> | 5.6 <sup>b</sup> | 5.7 <sup>a</sup> | 5.7 <sup>a</sup> | 5.7 <sup>a</sup> | 5.6 <sup>b</sup> | 5.5 <sup>c</sup> | 5.7 <sup>a</sup> |
| 3-Penten-2-one            | 5.3 <sup>c</sup> | 5.5 <sup>a</sup> | 5.4 <sup>b</sup> | 5.4 <sup>b</sup> | 5.3 <sup>c</sup> | 5.0 <sup>f</sup> | 5.0 <sup>f</sup> | 5.2 <sup>d</sup> | 5.1 <sup>e</sup> | 5.3 <sup>c</sup> |
| 5-Hexen-2-one             | 5.6 <sup>b</sup> | 5.9 <sup>a</sup> | 5.5 <sup>c</sup> | 5.5 <sup>c</sup> | 5.5 <sup>c</sup> | 5.5 <sup>c</sup> | 5.5 <sup>c</sup> | 5.4 <sup>d</sup> | 5.3 <sup>e</sup> | 5.5 <sup>c</sup> |
| 6-Hepten-2-one            | 5.3 <sup>d</sup> | 5.7 <sup>a</sup> | 5.6 <sup>b</sup> | 5.6 <sup>b</sup> | 5.3 <sup>d</sup> | 4.9 <sup>f</sup> | 4.9 <sup>f</sup> | 5.4 <sup>c</sup> | 5.1 <sup>e</sup> | 5.3 <sup>d</sup> |
| 5-Hepten-2-one            | 5.4 <sup>d</sup> | 6.0 <sup>a</sup> | 5.2 <sup>e</sup> | 5.2 <sup>e</sup> | 5.4 <sup>d</sup> | 4.5 <sup>f</sup> | 4.5 <sup>f</sup> | 5.6 <sup>c</sup> | 5.7 <sup>b</sup> | 5.4 <sup>d</sup> |
| 1-Octen-3-one             | 5.0 <sup>e</sup> | 5.0 <sup>e</sup> | 5.3 <sup>b</sup> | 5.3 <sup>b</sup> | 5.5 <sup>a</sup> | 5.2 <sup>c</sup> | 5.2 <sup>c</sup> | 5.1 <sup>d</sup> | 4.9 <sup>f</sup> | 5.5 <sup>a</sup> |
| 8-Nonen-2-one             | 5.6 <sup>e</sup> | 6.2 <sup>b</sup> | 6.3 <sup>a</sup> | 6.3 <sup>a</sup> | 5.7 <sup>d</sup> | 5.4 <sup>f</sup> | 5.4 <sup>f</sup> | 6.1 <sup>c</sup> | 5.7 <sup>d</sup> | 5.7 <sup>d</sup> |
| 3-Hydroxy-2-butanone      | 5.0 <sup>b</sup> | 4.8 <sup>d</sup> | 4.9 <sup>c</sup> | 4.9 <sup>c</sup> | 4.5 <sup>e</sup> | 5.1 <sup>a</sup> | 5.1 <sup>a</sup> | 4.8 <sup>d</sup> | 4.4 <sup>f</sup> | 4.5 <sup>e</sup> |
| 2,3-Butanedione           | 6.5 <sup>d</sup> | 6.9 <sup>a</sup> | 6.8 <sup>b</sup> | 6.8 <sup>b</sup> | 6.6 <sup>c</sup> | 6.4 <sup>e</sup> | 6.4 <sup>e</sup> | 6.8 <sup>b</sup> | 6.5 <sup>d</sup> | 6.6 <sup>c</sup> |
| 2,3-Pentanedione          | 5.2 <sup>d</sup> | 5.4 <sup>c</sup> | 5.6 <sup>a</sup> | 5.6 <sup>a</sup> | 5.6 <sup>a</sup> | 5.5 <sup>b</sup> | 5.5 <sup>b</sup> | 5.4 <sup>c</sup> | 5.2 <sup>d</sup> | 5.6 <sup>a</sup> |
| 2,3-Hexanedione           | 4.3 <sup>c</sup> | 4.0 <sup>e</sup> | 4.6 <sup>a</sup> | 4.6 <sup>a</sup> | 4.2 <sup>d</sup> | 4.4 <sup>b</sup> | 4.4 <sup>b</sup> | 4.4 <sup>b</sup> | 4.3 <sup>c</sup> | 4.2 <sup>d</sup> |
| 2,3-Octanedione           | 5.0 <sup>d</sup> | 5.0 <sup>d</sup> | 5.4 <sup>c</sup> | 5.4 <sup>c</sup> | 5.6 <sup>a</sup> | 5.5 <sup>b</sup> | 5.5 <sup>b</sup> | 5.4 <sup>c</sup> | 5.0 <sup>d</sup> | 5.6 <sup>a</sup> |
| 3-Methyl-2-butanone       | 5.9 <sup>a</sup> | 5.8 <sup>b</sup> | 5.7 <sup>c</sup> | 5.7 <sup>c</sup> | 5.6 <sup>d</sup> | 5.6 <sup>d</sup> | 5.6 <sup>d</sup> | 5.7 <sup>c</sup> | 5.7 <sup>c</sup> | 5.6 <sup>d</sup> |
| 4-Methyl-2-pentanone      | 5.6 <sup>b</sup> | 5.2 <sup>e</sup> | 5.7 <sup>a</sup> | 5.7 <sup>a</sup> | 5.5 <sup>c</sup> | 5.3 <sup>d</sup> | 5.3 <sup>d</sup> | 5.6 <sup>b</sup> | 5.5 <sup>c</sup> | 5.5 <sup>c</sup> |
| 2-Methyl-3-pentanone      | 4.8 <sup>a</sup> | 4.7 <sup>b</sup> | 4.7 <sup>b</sup> | 4.7 <sup>b</sup> | 4.7 <sup>b</sup> | 4.7 <sup>b</sup> | 4.7 <sup>b</sup> | 4.8 <sup>a</sup> | 4.7 <sup>b</sup> | 4.7 <sup>b</sup> |
| <i>Ketones</i>            |                  |                  |                  |                  |                  |                  |                  |                  |                  |                  |
| 3-Methyl-2-pentanone      | 6.5 <sup>a</sup> | 6.4 <sup>b</sup> | 6.4 <sup>b</sup> | 6.4 <sup>b</sup> | 6.3 <sup>c</sup> | 6.2 <sup>d</sup> | 6.2 <sup>d</sup> | 6.4 <sup>b</sup> | 6.4 <sup>b</sup> | 6.3 <sup>c</sup> |
| 5-Methyl-2-hexanone       | 5.2 <sup>b</sup> | 5.5 <sup>a</sup> | 5.5 <sup>a</sup> | 5.5 <sup>a</sup> | 5.0 <sup>c</sup> | 4.8 <sup>e</sup> | 4.8 <sup>e</sup> | 5.2 <sup>b</sup> | 4.9 <sup>d</sup> | 5.0 <sup>c</sup> |
| 3-Methyl-2-heptanone      | 5.5 <sup>c</sup> | 5.8 <sup>a</sup> | 5.7 <sup>b</sup> | 5.7 <sup>b</sup> | 5.4 <sup>d</sup> | 5.0 <sup>f</sup> | 5.0 <sup>f</sup> | 5.7 <sup>b</sup> | 5.3 <sup>e</sup> | 5.4 <sup>d</sup> |
| 6-Methyl-3-heptanone      | 4.5 <sup>b</sup> | 4.4 <sup>c</sup> | 4.4 <sup>c</sup> | 4.4 <sup>c</sup> | 4.1 <sup>e</sup> | 3.4 <sup>f</sup> | 3.4 <sup>f</sup> | 4.6 <sup>a</sup> | 4.3 <sup>d</sup> | 4.1 <sup>e</sup> |
| 6-Methyl-2-heptanone      | 4.7 <sup>d</sup> | 4.9 <sup>b</sup> | 5.0 <sup>a</sup> | 5.0 <sup>a</sup> | 4.8 <sup>c</sup> | 4.9 <sup>b</sup> | 4.9 <sup>b</sup> | 4.8 <sup>c</sup> | 4.6 <sup>e</sup> | 4.8 <sup>c</sup> |
| 5-Methyl-2-heptanone      | 4.6 <sup>d</sup> | 5.1 <sup>a</sup> | 5.1 <sup>a</sup> | 5.1 <sup>a</sup> | 4.7 <sup>c</sup> | 4.5 <sup>e</sup> | 4.5 <sup>e</sup> | 4.9 <sup>b</sup> | 4.4              | 4.7 <sup>c</sup> |
| Cyclopentanone            | 4.7 <sup>c</sup> | 4.8 <sup>b</sup> | 4.6 <sup>d</sup> | 4.6 <sup>d</sup> | 4.5 <sup>e</sup> | 5.0 <sup>a</sup> | 5.0 <sup>a</sup> | 4.8 <sup>b</sup> | 4.5 <sup>e</sup> | 4.5 <sup>e</sup> |
| 1-Phenyl-ethanone         | 5.4 <sup>c</sup> | 5.5 <sup>b</sup> | 5.5 <sup>b</sup> | 5.5 <sup>b</sup> | 5.5 <sup>b</sup> | 5.7 <sup>a</sup> | 5.7 <sup>a</sup> | 5.5 <sup>b</sup> | 5.4 <sup>c</sup> | 5.5 <sup>b</sup> |
| <i>Esters</i>             |                  |                  |                  |                  |                  |                  |                  |                  |                  |                  |
| Methyl acetate            | 4.6 <sup>c</sup> | 5.0 <sup>a</sup> | 4.9 <sup>b</sup> | 4.9 <sup>b</sup> | 4.8              | 4.9 <sup>b</sup> | 4.9 <sup>b</sup> | 4.7 <sup>d</sup> | 4.4 <sup>f</sup> | 4.8 <sup>c</sup> |
| Methyl butanoate          | 5.5 <sup>d</sup> | 5.9 <sup>a</sup> | 5.8 <sup>b</sup> | 5.8 <sup>b</sup> | 5.6 <sup>c</sup> | 5.5 <sup>d</sup> | 5.5 <sup>d</sup> | 5.4 <sup>e</sup> | 5.2 <sup>f</sup> | 5.6 <sup>c</sup> |
| Methyl 3-methyl-butanoate | 4.2 <sup>b</sup> | 4.3 <sup>a</sup> | 4.3 <sup>a</sup> | 4.3 <sup>a</sup> | 4.1 <sup>c</sup> | 4.3 <sup>a</sup> | 4.3 <sup>a</sup> | 3.9 <sup>d</sup> | 3.3 <sup>e</sup> | 4.1 <sup>c</sup> |
| Methyl 2-methyl-butanoate | 4.2 <sup>b</sup> | 4.2 <sup>b</sup> | 4.3 <sup>a</sup> | 4.3 <sup>a</sup> | 4.2 <sup>b</sup> | 4.3 <sup>a</sup> | 4.3 <sup>a</sup> | 4.0 <sup>c</sup> | 3.8 <sup>d</sup> | 4.2 <sup>b</sup> |
| Methyl pentanoate         | 4.4 <sup>c</sup> | 4.8 <sup>b</sup> | 4.9 <sup>a</sup> | 4.9 <sup>a</sup> | 4.9 <sup>a</sup> | 4.5 <sup>d</sup> | 4.5 <sup>d</sup> | 4.8 <sup>b</sup> | 4.6 <sup>c</sup> | 4.9 <sup>a</sup> |
| Methyl hexanoate          | 5.8 <sup>d</sup> | 6.1 <sup>a</sup> | 6.1 <sup>a</sup> | 6.1 <sup>a</sup> | 6.0 <sup>b</sup> | 5.9 <sup>c</sup> | 5.9 <sup>c</sup> | 5.9 <sup>c</sup> | 5.8 <sup>d</sup> | 6.0 <sup>b</sup> |
| Methyl octanoate          | 5.2 <sup>c</sup> | 5.4 <sup>a</sup> | 5.4 <sup>a</sup> | 5.4 <sup>a</sup> | 5.4 <sup>a</sup> | 5.4 <sup>a</sup> | 5.4 <sup>a</sup> | 5.3 <sup>b</sup> | 5.2 <sup>c</sup> | 5.4 <sup>a</sup> |
| Methyl benzoate           | 5.4 <sup>c</sup> | 5.4 <sup>c</sup> | 5.5 <sup>b</sup> | 5.5 <sup>b</sup> | 5.6 <sup>a</sup> | 5.6 <sup>a</sup> | 5.6 <sup>a</sup> | 5.4 <sup>c</sup> | 5.4 <sup>c</sup> | 5.6 <sup>a</sup> |
| Ethyl acetate             | 5.2 <sup>d</sup> | 5.8 <sup>a</sup> | 5.8 <sup>a</sup> | 5.8 <sup>a</sup> | 5.8 <sup>a</sup> | 5.8 <sup>a</sup> | 5.8 <sup>a</sup> | 5.6 <sup>b</sup> | 5.5 <sup>c</sup> | 5.8 <sup>a</sup> |
| Ethyl propanoate          | 3.6 <sup>d</sup> | 3.9 <sup>a</sup> | 3.7 <sup>c</sup> | 3.7 <sup>c</sup> | 3.7 <sup>c</sup> | 3.8 <sup>b</sup> | 3.8 <sup>b</sup> | 2.9 <sup>f</sup> | 3.0 <sup>e</sup> | 3.7 <sup>c</sup> |
| Ethyl 2-methyl-propionate | 4.0 <sup>c</sup> | 4.2 <sup>a</sup> | 4.2 <sup>a</sup> | 4.2 <sup>a</sup> | 4.1 <sup>b</sup> | 4.1 <sup>b</sup> | 4.1 <sup>b</sup> | 3.9 <sup>d</sup> | 3.8 <sup>e</sup> | 4.1 <sup>b</sup> |
| Ethyl butanoate           | 6.0 <sup>c</sup> | 6.2 <sup>a</sup> | 6.2 <sup>a</sup> | 6.2 <sup>a</sup> | 6.0 <sup>c</sup> | 6.1 <sup>b</sup> | 6.1 <sup>b</sup> | 5.9 <sup>d</sup> | 5.9 <sup>d</sup> | 6.0 <sup>c</sup> |
| Ethyl 2-butenolate        | 4.4 <sup>a</sup> | 4.3 <sup>b</sup> | 4.1 <sup>d</sup> | 4.1 <sup>d</sup> | 4.2 <sup>c</sup> | 4.3 <sup>b</sup> | 4.3 <sup>b</sup> | 4.3 <sup>b</sup> | 4.3 <sup>b</sup> | 4.2 <sup>c</sup> |
| Ethyl 2-methyl-butanoate  | 3.2 <sup>f</sup> | 4.0 <sup>b</sup> | 4.1 <sup>a</sup> | 4.1 <sup>a</sup> | 3.8 <sup>c</sup> | 3.5 <sup>d</sup> | 3.5 <sup>d</sup> | 3.4 <sup>e</sup> | 0.0 <sup>g</sup> | 3.8 <sup>c</sup> |
| Ethyl 3-methyl-butanoate  | 3.6 <sup>d</sup> | 4.3 <sup>a</sup> | 4.3 <sup>a</sup> | 4.3 <sup>a</sup> | 4.3 <sup>a</sup> | 4.2 <sup>b</sup> | 4.2 <sup>b</sup> | 4.1 <sup>c</sup> | 3.6 <sup>d</sup> | 4.3 <sup>a</sup> |
| Ethyl pentanoate          | 3.9 <sup>d</sup> | 4.3 <sup>b</sup> | 4.4 <sup>a</sup> | 4.4 <sup>a</sup> | 4.3 <sup>b</sup> | 4.3 <sup>b</sup> | 4.3 <sup>b</sup> | 4.2 <sup>c</sup> | 3.4 <sup>e</sup> | 4.3 <sup>b</sup> |
| Ethyl hexanoate           | 5.9 <sup>e</sup> | 6.3 <sup>a</sup> | 6.3 <sup>a</sup> | 6.3 <sup>a</sup> | 6.2 <sup>b</sup> | 6.2 <sup>b</sup> | 6.2 <sup>b</sup> | 6.1 <sup>c</sup> | 6.0 <sup>d</sup> | 6.2 <sup>b</sup> |
| Ethyl heptanoate          | 3.6 <sup>e</sup> | 4.2 <sup>a</sup> | 4.2 <sup>a</sup> | 4.2 <sup>a</sup> | 4.1 <sup>b</sup> | 4.2 <sup>a</sup> | 4.2 <sup>a</sup> | 3.9 <sup>c</sup> | 3.8 <sup>d</sup> | 4.1 <sup>b</sup> |
| Ethyl octanoate           | 4.4 <sup>f</sup> | 4.9 <sup>c</sup> | 4.9 <sup>c</sup> | 4.9 <sup>c</sup> | 5.0 <sup>b</sup> | 5.1 <sup>a</sup> | 5.1 <sup>a</sup> | 4.8 <sup>d</sup> | 4.6 <sup>e</sup> | 5.0 <sup>g</sup> |
| <i>Esters</i>             |                  |                  |                  |                  |                  |                  |                  |                  |                  |                  |
| Propyl acetate            | 4.3 <sup>b</sup> | 4.3 <sup>b</sup> | 4.4 <sup>a</sup> | 4.4 <sup>a</sup> | 4.4 <sup>a</sup> | 4.4 <sup>a</sup> | 4.4 <sup>a</sup> | 4.4 <sup>a</sup> | 4.3 <sup>b</sup> | 4.4 <sup>a</sup> |
| Propyl butanoate          | 4.3 <sup>c</sup> | 4.6 <sup>a</sup> | 4.4 <sup>b</sup> | 4.4 <sup>b</sup> | 4.3 <sup>c</sup> | 4.2 <sup>d</sup> | 4.2 <sup>d</sup> | 4.2 <sup>d</sup> | 3.9 <sup>e</sup> | 4.3 <sup>c</sup> |
| Propyl hexanoate          | 4.1 <sup>c</sup> | 3.9 <sup>d</sup> | 4.2 <sup>b</sup> | 4.2 <sup>b</sup> | 4.2 <sup>b</sup> | 4.3 <sup>a</sup> | 4.3 <sup>a</sup> | 3.9 <sup>d</sup> | 3.8 <sup>e</sup> | 4.2 <sup>b</sup> |



|                                    |                  |                  |                  |                  |                  |                  |                  |                  |                  |                  |
|------------------------------------|------------------|------------------|------------------|------------------|------------------|------------------|------------------|------------------|------------------|------------------|
| Butyl acetate                      | 5.0 <sup>d</sup> | 5.0 <sup>d</sup> | 5.3 <sup>b</sup> | 5.3 <sup>b</sup> | 5.1 <sup>c</sup> | 5.8 <sup>a</sup> | 5.8 <sup>a</sup> | 5.0 <sup>d</sup> | 5.1 <sup>c</sup> | 5.1 <sup>c</sup> |
| Butyl butanoate                    | 3.7 <sup>c</sup> | 4.1 <sup>a</sup> | 4.1 <sup>a</sup> | 4.1 <sup>a</sup> | 3.6 <sup>d</sup> | 2.9 <sup>e</sup> | 2.9 <sup>e</sup> | 3.9 <sup>b</sup> | 0.0 <sup>f</sup> | 3.6 <sup>d</sup> |
| Pentyl acetate                     | 3.5 <sup>d</sup> | 3.7 <sup>c</sup> | 4.0 <sup>b</sup> | 4.0 <sup>b</sup> | 4.2 <sup>a</sup> | 3.7 <sup>c</sup> | 3.7 <sup>c</sup> | 3.7 <sup>c</sup> | 3.1 <sup>e</sup> | 4.2 <sup>a</sup> |
| 2-Pentyl butanoate                 | 4.4 <sup>b</sup> | 4.6 <sup>a</sup> | 3.8 <sup>e</sup> | 3.8 <sup>e</sup> | 4.1 <sup>d</sup> | 4.3 <sup>c</sup> | 4.3 <sup>c</sup> | 3.7 <sup>f</sup> | 3.8 <sup>e</sup> | 4.1 <sup>d</sup> |
| Hexyl acetate                      | 4.0 <sup>c</sup> | 3.7 <sup>e</sup> | 3.9 <sup>d</sup> | 3.9 <sup>d</sup> | 3.9 <sup>d</sup> | 4.2 <sup>b</sup> | 4.2 <sup>b</sup> | 4.3 <sup>a</sup> | 3.7 <sup>e</sup> | 3.9 <sup>d</sup> |
| 3-Methyl-butyl acetate             | 4.8 <sup>f</sup> | 5.4 <sup>a</sup> | 5.2 <sup>c</sup> | 4.5 <sup>g</sup> | 5.3 <sup>b</sup> | 5.1 <sup>d</sup> | 4.2 <sup>i</sup> | 5.3 <sup>b</sup> | 4.9 <sup>e</sup> | 4.3 <sup>h</sup> |
| 2-Methyl-butyl acetate             | 4.4 <sup>d</sup> | 4.6 <sup>c</sup> | 4.6 <sup>c</sup> | 4.0 <sup>g</sup> | 4.7 <sup>b</sup> | 4.8 <sup>a</sup> | 4.1 <sup>f</sup> | 4.6 <sup>c</sup> | 4.3 <sup>e</sup> | 4.1 <sup>f</sup> |
| 1-Methyl-propyl butanoate          | 3.9 <sup>e</sup> | 4.2 <sup>c</sup> | 4.2 <sup>c</sup> | 5.2 <sup>a</sup> | 3.8 <sup>f</sup> | 4.0 <sup>d</sup> | 5.1 <sup>b</sup> | 3.6 <sup>g</sup> | 3.5 <sup>h</sup> | 5.3 <sup>i</sup> |
| 2-Methyl-propyl butanoate          | 5.0 <sup>c</sup> | 5.1 <sup>b</sup> | 5.2 <sup>a</sup> | 4.6 <sup>g</sup> | 4.9 <sup>d</sup> | 5.0 <sup>c</sup> | 4.8 <sup>e</sup> | 4.9 <sup>d</sup> | 4.7 <sup>f</sup> | 4.7 <sup>f</sup> |
| Isopropyl butanoate                | 4.4 <sup>c</sup> | 4.6 <sup>a</sup> | 4.5 <sup>b</sup> | 4.2 <sup>e</sup> | 4.3 <sup>d</sup> | 4.2 <sup>e</sup> | 4.0 <sup>f</sup> | 4.2 <sup>e</sup> | 3.8 <sup>g</sup> | 3.8 <sup>g</sup> |
| 2-Methyl-propyl acetate            | 3.8 <sup>f</sup> | 4.1 <sup>d</sup> | 4.0 <sup>e</sup> | 5.2 <sup>a</sup> | 4.1 <sup>d</sup> | 4.1 <sup>d</sup> | 5.0 <sup>b</sup> | 4.1 <sup>d</sup> | 3.8 <sup>f</sup> | 4.9 <sup>c</sup> |
| <i>Esters</i>                      |                  |                  |                  |                  |                  |                  |                  |                  |                  |                  |
| 3-Methyl-butyl butanoate           | 5.2 <sup>c</sup> | 5.3 <sup>b</sup> | 5.4 <sup>a</sup> | 5.4 <sup>a</sup> | 5.2 <sup>c</sup> | 5.3 <sup>b</sup> | 5.3 <sup>b</sup> | 5.1 <sup>d</sup> | 5.0 <sup>e</sup> | 5.2 <sup>c</sup> |
| 2-Methyl-butyl butanoate           | 4.8 <sup>c</sup> | 4.9 <sup>b</sup> | 4.9 <sup>b</sup> | 4.9 <sup>b</sup> | 4.8 <sup>c</sup> | 5.1 <sup>a</sup> | 5.1 <sup>a</sup> | 4.7 <sup>d</sup> | 4.4 <sup>e</sup> | 4.8 <sup>c</sup> |
| <i>Sulfur compounds</i>            |                  |                  |                  |                  |                  |                  |                  |                  |                  |                  |
| Methanethiol                       | 4.7 <sup>d</sup> | 4.7 <sup>d</sup> | 5.0 <sup>c</sup> | 5.0 <sup>c</sup> | 5.4 <sup>a</sup> | 5.1 <sup>b</sup> | 5.1 <sup>b</sup> | 4.7 <sup>d</sup> | 4.4 <sup>e</sup> | 5.4 <sup>a</sup> |
| Dimethyl-sulfide                   | 4.2 <sup>a</sup> | 4.0 <sup>c</sup> | 4.1 <sup>b</sup> | 4.1 <sup>b</sup> | 3.8 <sup>e</sup> | 4.2 <sup>a</sup> | 4.2 <sup>a</sup> | 4.0 <sup>c</sup> | 3.9 <sup>d</sup> | 3.8 <sup>e</sup> |
| Dimethyl-disulfide                 | 6.6 <sup>c</sup> | 6.5 <sup>d</sup> | 6.7 <sup>b</sup> | 6.7 <sup>b</sup> | 6.9 <sup>a</sup> | 6.9 <sup>a</sup> | 6.9 <sup>a</sup> | 6.7 <sup>b</sup> | 6.6 <sup>c</sup> | 6.9 <sup>a</sup> |
| Dimethyl-trisulfide                | 4.8 <sup>c</sup> | 4.6 <sup>e</sup> | 4.8 <sup>c</sup> | 4.8 <sup>c</sup> | 5.1 <sup>b</sup> | 5.5 <sup>a</sup> | 5.5 <sup>a</sup> | 4.7 <sup>d</sup> | 4.5 <sup>f</sup> | 5.1 <sup>b</sup> |
| 2,4-Dithiapentane                  | 5.6 <sup>b</sup> | 5.5 <sup>c</sup> | 5.5 <sup>c</sup> | 5.5 <sup>c</sup> | 5.4 <sup>d</sup> | 5.2 <sup>f</sup> | 5.2 <sup>f</sup> | 5.9 <sup>a</sup> | 4.8 <sup>g</sup> | 5.4 <sup>e</sup> |
| Methional                          | 4.1 <sup>f</sup> | 4.3 <sup>e</sup> | 4.6 <sup>c</sup> | 4.0 <sup>g</sup> | 4.8 <sup>b</sup> | 5.0 <sup>a</sup> | 4.3 <sup>e</sup> | 4.5 <sup>d</sup> | 3.6 <sup>h</sup> | 4.0 <sup>g</sup> |
| S-methyl thioacetate               | 5.1 <sup>d</sup> | 5.3 <sup>c</sup> | 5.6 <sup>a</sup> | 4.6 <sup>g</sup> | 5.4 <sup>b</sup> | 5.0 <sup>e</sup> | 5.0 <sup>e</sup> | 5.4 <sup>b</sup> | 5.3 <sup>c</sup> | 4.8 <sup>f</sup> |
| Thiophene                          | 5.1 <sup>d</sup> | 5.3 <sup>c</sup> | 5.3 <sup>c</sup> | 5.6 <sup>a</sup> | 5.3 <sup>c</sup> | 5.6 <sup>a</sup> | 5.0 <sup>e</sup> | 5.3 <sup>c</sup> | 5.1 <sup>d</sup> | 5.4 <sup>b</sup> |
| 2-Methyl-tetrahydro-thiophen-3-one | 4.9 <sup>c</sup> | 4.8 <sup>d</sup> | 4.7 <sup>e</sup> | 5.3 <sup>b</sup> | 4.9 <sup>c</sup> | 4.9 <sup>c</sup> | 5.6 <sup>a</sup> | 4.8 <sup>d</sup> | 4.8 <sup>d</sup> | 5.3 <sup>b</sup> |
| Methyl isothiocyanate              | 5.1 <sup>e</sup> | 4.9 <sup>f</sup> | 5.9 <sup>b</sup> | 4.7 <sup>h</sup> | 6.4 <sup>a</sup> | 5.8 <sup>c</sup> | 4.9 <sup>f</sup> | 5.2 <sup>d</sup> | 4.8 <sup>g</sup> | 4.9 <sup>f</sup> |
| <i>Furans</i>                      |                  |                  |                  |                  |                  |                  |                  |                  |                  |                  |
| 2-Methyl-furan                     | 4.7 <sup>f</sup> | 4.6 <sup>g</sup> | 4.9 <sup>d</sup> | 5.9 <sup>b</sup> | 4.9 <sup>d</sup> | 4.8 <sup>e</sup> | 5.8 <sup>c</sup> | 4.8 <sup>e</sup> | 4.6 <sup>g</sup> | 6.4 <sup>a</sup> |
| 2-Ethyl-furan                      | 5.3 <sup>c</sup> | 5.2 <sup>d</sup> | 5.5 <sup>b</sup> | 4.9 <sup>f</sup> | 5.6 <sup>a</sup> | 5.6 <sup>a</sup> | 4.8 <sup>g</sup> | 5.3 <sup>c</sup> | 5.1 <sup>e</sup> | 4.9 <sup>f</sup> |
| 2-Propyl-furan                     | 4.6 <sup>e</sup> | 4.5 <sup>f</sup> | 4.6 <sup>e</sup> | 5.5 <sup>b</sup> | 4.7 <sup>d</sup> | 4.8 <sup>c</sup> | 5.6 <sup>a</sup> | 4.5 <sup>f</sup> | 4.5 <sup>f</sup> | 5.6 <sup>a</sup> |
| 3-Methyl-furan                     | 4.8 <sup>b</sup> | 4.7 <sup>c</sup> | 4.8 <sup>b</sup> | 4.6 <sup>d</sup> | 4.7 <sup>c</sup> | 4.6 <sup>d</sup> | 4.8 <sup>b</sup> | 4.9 <sup>a</sup> | 4.6 <sup>d</sup> | 4.7 <sup>c</sup> |
| 2,4-Dimethyl-furan                 | 4.6 <sup>f</sup> | 4.8 <sup>d</sup> | 4.9 <sup>c</sup> | 4.3 <sup>i</sup> | 4.5 <sup>g</sup> | 4.7 <sup>e</sup> | 4.4 <sup>h</sup> | 5.2 <sup>a</sup> | 5.0 <sup>b</sup> | 3.9 <sup>j</sup> |
| 2,5-Dimethyl-furan                 | 4.9 <sup>a</sup> | 4.4 <sup>f</sup> | 4.3 <sup>g</sup> | 4.8 <sup>b</sup> | 3.9 <sup>h</sup> | 4.4 <sup>f</sup> | 4.6 <sup>d</sup> | 4.5 <sup>e</sup> | 4.4 <sup>f</sup> | 4.7 <sup>c</sup> |
| Furfural                           | 4.8 <sup>d</sup> | 4.5 <sup>g</sup> | 5.1 <sup>a</sup> | 4.9 <sup>c</sup> | 4.7 <sup>e</sup> | 5.0 <sup>b</sup> | 4.7 <sup>e</sup> | 4.6 <sup>f</sup> | 4.5 <sup>g</sup> | 4.5 <sup>g</sup> |

\*Only VOC that showed variation ( $P \leq 0.05$ ) between samples. The data are the means of three independent experiments, and values in the same row followed by different lowercase letters (a to k) differs significantly values  $\pm$  standard deviations for three batches of each type of cheese, analysed in duplicate. Row with different superscript letters are significantly different ( $P \leq 0.05$ ).

§Slice of each cheese was cut into nine sub-blocks identified by the letters A - I. Sub-blocks A, D, and G, and sub-blocks C, F and I were collected from top and bottom surface region, respectively, whereas sub-blocks B and H from inner side region, and sub-block E from the core. The whole slice was the control. Further details were reported in the Material and Methods and in Fig. 1.
