# Supplementary material for: Spatial Distribution of the Metabolically Active Microbiota within Italian PDO Ewes' Milk Cheeses
Source: PubMed Central journal article supplement (PMC4830609; doi:10.1371/journal.pone.0153213), 2016-04-13
Supplement: pone.0153213.s007.pdf [file pone.0153213.s007.pdf]

**S4 Table. Observed diversity and estimated sample coverage of 16S rRNA sequencing analysis of Fiore Sardo, Pecorino Siciliano and Pecorino Toscano cheeses.**

| Cheese             | Sample   | No. of reads | No. of OTUs | Chao1 richness | Shannon diversity index |
|--------------------|----------|--------------|-------------|----------------|-------------------------|
| Fiore Sardo        | Control* | 8379         | 17          | 20             | 1.07                    |
|                    | A        | 5112         | 19          | 24             | 1.02                    |
|                    | D        | 4169         | 18          | 39             | 1.03                    |
|                    | G        | 4009         | 15          | 15.5           | 1.16                    |
|                    | B        | 4626         | 15          | 15.2           | 0.99                    |
|                    | E        | 6488         | 19          | 19.6           | 0.93                    |
|                    | H        | 3706         | 16          | 17             | 0.98                    |
|                    | C        | 4065         | 17          | 20             | 1.01                    |
|                    | F        | 5540         | 19          | 25             | 1.07                    |
|                    | I        | 4196         | 13          | 14.5           | 1.03                    |
| Pecorino Siciliano | Control* | 3110         | 31          | 31.2           | 1.72                    |
|                    | A        | 2763         | 18          | 24             | 1.24                    |
|                    | D        | 3070         | 24          | 26             | 1.43                    |
|                    | G        | 4487         | 23          | 26.3           | 1.32                    |
|                    | B        | 2357         | 21          | 21.6           | 1.20                    |
|                    | E        | 4264         | 23          | 24             | 1.05                    |
|                    | H        | 3338         | 24          | 24             | 1.19                    |
|                    | C        | 4124         | 23          | 24.4           | 1.24                    |
|                    | F        | 3430         | 27          | 28.2           | 1.56                    |
|                    | I        | 3989         | 21          | 24             | 1.42                    |
| Pecorino Toscano   | Control* | 4923         | 15          | 15.2           | 0.49                    |
|                    | A        | 4184         | 16          | 16.3           | 0.61                    |
|                    | D        | 6220         | 20          | 20.3           | 0.74                    |
|                    | G        | 6342         | 18          | 18.3           | 0.62                    |
|                    | B        | 4652         | 13          | 16             | 0.27                    |
|                    | E        | 9402         | 9           | 9              | 0.17                    |
|                    | H        | 6630         | 14          | 15.5           | 0.28                    |
|                    | C        | 5749         | 14          | 17             | 0.34                    |
|                    | F        | 5062         | 10          | 14             | 0.30                    |
|                    | I        | 4476         | 17          | 24             | 0.34                    |

Abbreviations: OTU, operational taxonomic unit; Chao1 richness and Shannon diversity were calculated with USEARCH based classifier.

\*Slice of each cheese was cut into nine sub-blocks identified by the letters A - I. Sub-blocks A, D, and G, and sub-blocks C, F and I were collected from top and bottom surface region, respectively, whereas sub-blocks B and H from inner side region, and sub-block E from the core. The whole slice was the control. Further details were reported in the Material and Methods and in Fig. 1.
